# Supplementary material for: Transcriptomic Profiling of Peripheral Edge of Lesions to Elucidate the Pathogenesis of Psoriasis Vulgaris
Source: MDPI journal article supplement (doi:10.3390/ijms23094983), 2022-04-30
Supplement: s1 [file s1]

## *Supplementary Material*

### 1. Result

#### 1.1. RNA sequencing

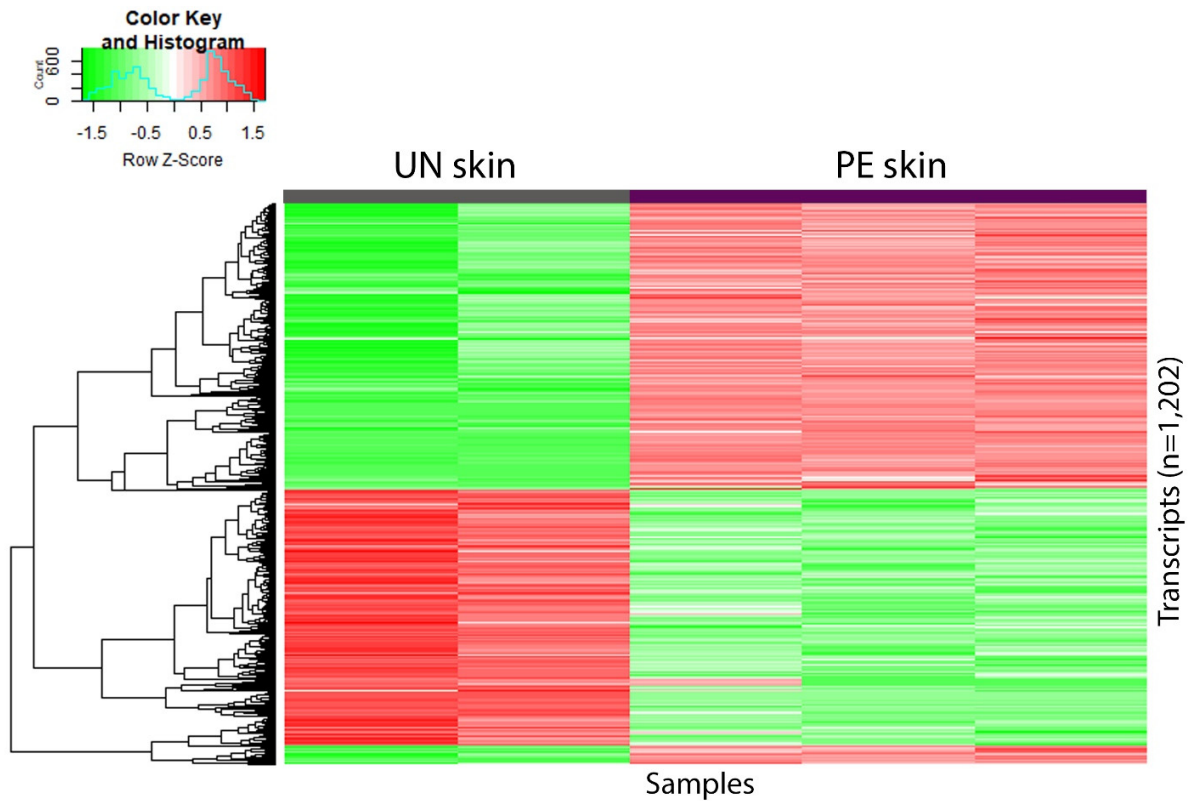

**Supplementary Figure S1.** The heat map of RNA-seq data.

Differentially altered transcripts between PE and UN skin (n=1,202) are shown in a heatmap image. The green color indicates low expression levels whereas red indicates high expression levels. The purple bar above the heatmap indicates PR skin and the grey bar above the heatmap indicates UN skin. PE skin, peripheral edge of lesional skin; UN skin, uninvolved skin.

## 1.2. DEGs analysis

**Supplementary Table S1.** The top-100 upregulated DEGs by Log 2FC.

|    | Gene symbol          | Gene title                                                                                        | Molecule type*          | Log 2FC | p-value  | FDR   |
|----|----------------------|---------------------------------------------------------------------------------------------------|-------------------------|---------|----------|-------|
| 1  | <i>A2M</i>           | alpha-2-macroglobulin                                                                             | transporter             | 15.982  | 8.60E-06 | 0.032 |
| 2  | <i>H3C2</i>          | H3 clustered histone 2                                                                            | other                   | 15.367  | 9.34E-05 | 0.037 |
| 3  | <i>PLEC</i>          | Plectin                                                                                           | other                   | 15.295  | 1.36E-05 | 0.032 |
| 4  | <i>ITSN2</i>         | intersectin 2                                                                                     | other                   | 14.968  | 3.20E-04 | 0.056 |
| 5  | <i>UGGT1</i>         | UDP-glucose glycoprotein glucosyltransferase 1                                                    | enzyme                  | 14.906  | 1.08E-04 | 0.038 |
| 6  | <i>STT3A</i>         | STT3 oligosaccharyltransferase complex catalytic subunit A                                        | enzyme                  | 14.745  | 3.46E-03 | 0.127 |
| 7  | <i>HERC6</i>         | HECT and RLD domain containing E3 ubiquitin protein ligase family member 6                        | enzyme                  | 14.724  | 1.12E-03 | 0.084 |
| 8  | <i>DEFB4A/DEFB4B</i> | defensin beta 4A                                                                                  | other                   | 14.690  | 1.40E-04 | 0.038 |
| 9  | <i>CAND1</i>         | cullin associated and neddylation dissociated 1                                                   | transcription regulator | 14.654  | 8.54E-03 | 0.183 |
| 10 | <i>HRNR</i>          | Hornerin                                                                                          | other                   | 14.597  | 1.34E-05 | 0.032 |
| 11 | <i>IL36A</i>         | interleukin 36 alpha                                                                              | cytokine                | 14.572  | 1.34E-04 | 0.038 |
| 12 | <i>SMARCA4</i>       | SWI/SNF related, matrix associated, actin dependent regulator of chromatin, subfamily a, member 4 | transcription regulator | 14.517  | 2.63E-05 | 0.032 |
| 13 | <i>CYFIP1</i>        | cytoplasmic FMR1 interacting protein 1                                                            | translation regulator   | 14.500  | 2.82E-03 | 0.116 |
| 14 | <i>HIPK3</i>         | homeodomain interacting protein kinase 3                                                          | kinase                  | 14.365  | 6.20E-03 | 0.161 |
| 15 | <i>PLA2G4E-AS1</i>   | PLA2G4E antisense RNA 1                                                                           | other                   | 14.274  | 8.59E-05 | 0.037 |
| 16 | <i>TRIP12</i>        | thyroid hormone receptor interactor 12                                                            | enzyme                  | 14.146  | 4.66E-03 | 0.141 |
| 17 | <i>CLIC1</i>         | chloride intracellular channel 1                                                                  | ion channel             | 14.091  | 4.11E-05 | 0.033 |
| 18 | <i>CD164</i>         | CD164 molecule                                                                                    | other                   | 14.069  | 1.28E-03 | 0.087 |
| 19 | <i>BZW1</i>          | basic leucine zipper and W2 domains 1                                                             | translation regulator   | 14.025  | 6.55E-03 | 0.163 |
| 20 | <i>NRBP1</i>         | nuclear receptor binding protein 1                                                                | kinase                  | 13.939  | 1.28E-04 | 0.038 |
| 21 | <i>PSMD12</i>        | proteasome 26S subunit, non-ATPase 12                                                             | other                   | 13.697  | 8.81E-05 | 0.037 |
| 22 | <i>EPB41L3</i>       | erythrocyte membrane protein band 4.1 like 3                                                      | other                   | 13.662  | 2.00E-03 | 0.103 |
| 23 | <i>SCYL2</i>         | SCY1 like pseudokinase 2                                                                          | other                   | 13.652  | 1.49E-04 | 0.039 |
| 24 | <i>H2BC10</i>        | H2B clustered histone 10                                                                          | other                   | 13.610  | 1.87E-04 | 0.044 |
| 25 | <i>WDR75</i>         | WD repeat domain 75                                                                               | other                   | 13.554  | 1.18E-03 | 0.085 |
| 26 | <i>H4C13</i>         | H4 clustered histone 13                                                                           | other                   | 13.550  | 1.08E-03 | 0.083 |
| 27 | <i>EXT2</i>          | exostosin glycosyltransferase 2                                                                   | enzyme                  | 13.432  | 4.74E-04 | 0.064 |
| 28 | <i>H3C7</i>          | H3 clustered histone 7                                                                            | other                   | 13.405  | 1.48E-03 | 0.091 |
| 29 | <i>PLEKHG5</i>       | pleckstrin homology and RhoGEF domain containing G5                                               | other                   | 13.319  | 2.03E-04 | 0.045 |
| 30 | <i>DMXL1</i>         | Dmx like 1                                                                                        | other                   | 13.302  | 1.93E-03 | 0.103 |
| 31 | <i>GBP6</i>          | guanylate binding protein family member 6                                                         | enzyme                  | 13.278  | 2.32E-03 | 0.109 |
| 32 | <i>H3C11</i>         | H3 clustered histone 11                                                                           | other                   | 13.099  | 4.59E-04 | 0.064 |
| 33 | <i>H2AC14</i>        | H2A clustered histone 14                                                                          | other                   | 13.092  | 4.20E-06 | 0.026 |
| 34 | <i>SMC6</i>          | structural maintenance of chromosomes 6                                                           | other                   | 12.917  | 2.03E-04 | 0.045 |
| 35 | <i>H2AC21</i>        | H2A clustered histone 21                                                                          | other                   | 12.847  | 7.45E-04 | 0.072 |
| 36 | <i>H2AC4</i>         | H2A clustered histone 4                                                                           | other                   | 12.793  | 5.31E-04 | 0.065 |
| 37 | <i>CD59</i>          | CD59 molecule (CD59 blood group)                                                                  | other                   | 12.792  | 9.37E-04 | 0.080 |
| 38 | <i>TMEM14EP</i>      | transmembrane protein 14E, pseudogene                                                             | other                   | 12.753  | 6.24E-04 | 0.069 |
| 39 | <i>GLB1</i>          | galactosidase beta 1                                                                              | enzyme                  | 12.717  | 1.27E-03 | 0.086 |
| 40 | <i>CTNBL1</i>        | catenin beta like 1                                                                               | other                   | 12.703  | 2.09E-03 | 0.105 |
| 41 | <i>GFPT1</i>         | glutamine--fructose-6-phosphate transaminase 1                                                    | enzyme                  | 12.637  | 3.91E-03 | 0.132 |
| 42 | <i>H3C8</i>          | H3 clustered histone 8                                                                            | other                   | 12.599  | 1.30E-04 | 0.038 |
| 43 | <i>ZDHHC6</i>        | zinc finger DHHC-type palmitoyltransferase 6                                                      | enzyme                  | 12.565  | 4.94E-03 | 0.144 |
| 44 | <i>IKBKB</i>         | inhibitor of nuclear factor kappa B kinase subunit beta                                           | kinase                  | 12.437  | 2.28E-03 | 0.107 |
| 45 | <i>GANAB</i>         | glucosidase II alpha subunit                                                                      | enzyme                  | 12.412  | 2.17E-04 | 0.046 |
| 46 | <i>TMEM184B</i>      | transmembrane protein 184B                                                                        | other                   | 12.410  | 1.41E-03 | 0.089 |
| 47 | <i>SEPTIN11</i>      | septin 11                                                                                         | other                   | 12.377  | 9.90E-04 | 0.081 |
| 48 | <i>RMDN3</i>         | regulator of microtubule dynamics 3                                                               | other                   | 12.322  | 3.10E-03 | 0.122 |
| 49 | <i>LPP</i>           | LIM domain containing preferred translocation partner in lipoma                                   | other                   | 12.292  | 2.60E-03 | 0.113 |
| 50 | <i>H2BC13</i>        | H2B clustered histone 13                                                                          | other                   | 12.292  | 5.60E-03 | 0.152 |
| 51 | <i>MCTP1</i>         | multiple C2 and transmembrane domain containing 1                                                 | other                   | 12.291  | 1.00E-03 | 0.081 |

|     |                 |                                                                        |                            |        |          |       |
|-----|-----------------|------------------------------------------------------------------------|----------------------------|--------|----------|-------|
| 52  | <i>CAP1</i>     | cyclase associated actin cytoskeleton regulatory protein 1             | other                      | 12.224 | 2.19E-03 | 0.105 |
| 53  | <i>SLC6A9</i>   | solute carrier family 6 member 9                                       | transporter                | 12.169 | 3.08E-03 | 0.122 |
| 54  | <i>SSR3</i>     | signal sequence receptor subunit 3                                     | other                      | 12.124 | 1.38E-03 | 0.089 |
| 55  | <i>SPRR2C</i>   | small proline rich protein 2C (pseudogene)                             | other                      | 12.058 | 9.68E-03 | 0.191 |
| 56  | <i>TBC1D22A</i> | TBC1 domain family member 22A                                          | other                      | 12.048 | 3.29E-03 | 0.124 |
| 57  | <i>VMP1</i>     | vacuole membrane protein 1                                             | other                      | 12.040 | 8.84E-03 | 0.185 |
| 58  | <i>ERCC3</i>    | ERCC excision repair 3, TFIIH core complex helicase subunit            | enzyme                     | 12.024 | 1.44E-03 | 0.090 |
| 59  | <i>DENND5A</i>  | DENN domain containing 5A                                              | other                      | 11.952 | 3.25E-03 | 0.124 |
| 60  | <i>H4C1</i>     | H4 clustered histone 1                                                 | other                      | 11.942 | 4.08E-03 | 0.133 |
| 61  | <i>MPP1</i>     | membrane palmitoylated protein 1                                       | kinase                     | 11.925 | 1.63E-03 | 0.094 |
| 62  | <i>TRAPPC9</i>  | trafficking protein particle complex 9                                 | other                      | 11.903 | 2.33E-03 | 0.109 |
| 63  | <i>EDNRB</i>    | endothelin receptor type B                                             | G-protein coupled receptor | 11.815 | 5.82E-03 | 0.156 |
| 64  | <i>MYH11</i>    | myosin heavy chain 11                                                  | other                      | 11.751 | 6.25E-05 | 0.035 |
| 65  | <i>CDR1</i>     | cerebellar degeneration related protein 1                              | other                      | 11.657 | 2.49E-03 | 0.112 |
| 66  | <i>UTY</i>      | ubiquitously transcribed tetratricopeptide repeat containing, Y-linked | enzyme                     | 11.645 | 2.94E-03 | 0.120 |
| 67  | <i>PISD</i>     | phosphatidylserine decarboxylase                                       | enzyme                     | 11.566 | 1.93E-03 | 0.103 |
| 68  | <i>RELCH</i>    | RAB11 binding and LisH domain, coiled-coil and HEAT repeat containing  | other                      | 11.548 | 2.20E-03 | 0.105 |
| 69  | <i>AHNAK</i>    | AHNAK nucleoprotein                                                    | other                      | 11.483 | 2.50E-03 | 0.112 |
| 70  | <i>H2AC15</i>   | H2A clustered histone 15                                               | other                      | 11.462 | 6.90E-03 | 0.166 |
| 71  | <i>SNORA94</i>  | small nucleolar RNA, H/ACA box 94                                      | other                      | 11.406 | 7.09E-03 | 0.167 |
| 72  | <i>RBM5-AS1</i> | RBM5 antisense RNA 1                                                   | other                      | 11.393 | 6.28E-03 | 0.161 |
| 73  | <i>SLC24A1</i>  | solute carrier family 24 member 1                                      | transporter                | 11.355 | 7.95E-03 | 0.177 |
| 74  | <i>TOP1MT</i>   | DNA topoisomerase I mitochondrial                                      | enzyme                     | 11.254 | 8.62E-04 | 0.077 |
| 75  | <i>EGFR-AS1</i> | EGFR antisense RNA 1                                                   | other                      | 11.235 | 8.58E-03 | 0.184 |
| 76  | <i>THRIL</i>    | TNF and HNRNPL related immunoregulatory long non-coding RNA            | other                      | 11.196 | 6.76E-03 | 0.165 |
| 77  | <i>UXS1</i>     | UDP-glucuronate decarboxylase 1                                        | enzyme                     | 11.179 | 9.15E-03 | 0.189 |
| 78  | <i>SMG5</i>     | SMG5 nonsense mediated mRNA decay factor                               | other                      | 11.140 | 1.00E-03 | 0.081 |
| 79  | <i>FAM104A</i>  | family with sequence similarity 104 member A                           | other                      | 11.126 | 7.56E-03 | 0.173 |
| 80  | <i>PCLO</i>     | piccolo presynaptic cytomatrix protein                                 | transporter                | 11.096 | 9.26E-03 | 0.189 |
| 81  | <i>H4C5</i>     | ankyrin 3                                                              | other                      | 10.982 | 8.66E-04 | 0.077 |
| 82  | <i>ANK3</i>     | H4 clustered histone 5                                                 | other                      | 10.982 | 6.31E-03 | 0.161 |
| 83  | <i>SCARNA13</i> | small Cajal body-specific RNA 13                                       | other                      | 10.936 | 5.46E-06 | 0.026 |
| 84  | <i>SNORD133</i> | small nucleolar RNA, C/D box 133                                       | other                      | 10.891 | 1.05E-03 | 0.082 |
| 85  | <i>TWF1</i>     | twinfilin actin binding protein 1                                      | kinase                     | 10.854 | 5.24E-03 | 0.148 |
| 86  | <i>INSYN2A</i>  | inhibitory synaptic factor 2A                                          | other                      | 10.841 | 8.15E-03 | 0.180 |
| 87  | <i>TNIP3</i>    | TNFAIP3 interacting protein 3                                          | other                      | 10.794 | 6.58E-03 | 0.163 |
| 88  | <i>KIFAP3</i>   | kinesin associated protein 3                                           | other                      | 10.753 | 1.78E-03 | 0.099 |
| 89  | <i>H1-1</i>     | H1.1 linker histone, cluster member                                    | other                      | 10.710 | 5.23E-03 | 0.148 |
| 90  | <i>H3C14</i>    | H3 clustered histone 14                                                | other                      | 10.708 | 1.47E-03 | 0.090 |
| 91  | <i>SERPINB4</i> | serpin family B member 4                                               | other                      | 10.691 | 7.43E-03 | 0.172 |
| 92  | <i>FBXO28</i>   | F-box protein 28                                                       | other                      | 10.682 | 4.89E-03 | 0.144 |
| 93  | <i>CXCL8</i>    | C-X-C motif chemokine ligand 8                                         | cytokine                   | 10.681 | 6.58E-04 | 0.070 |
| 94  | <i>MPZL3</i>    | myelin protein zero like 3                                             | other                      | 10.651 | 7.44E-04 | 0.072 |
| 95  | <i>H3C3</i>     | H3 clustered histone 3                                                 | other                      | 10.623 | 4.60E-04 | 0.064 |
| 96  | <i>PRKAG1</i>   | protein kinase AMP-activated non-catalytic subunit gamma 1             | kinase                     | 10.622 | 1.06E-03 | 0.082 |
| 97  | <i>AKAP1</i>    | A-kinase anchoring protein 1                                           | other                      | 10.614 | 3.80E-03 | 0.131 |
| 98  | <i>PSTPIP1</i>  | proline-serine-threonine phosphatase interacting protein 1             | other                      | 10.612 | 9.05E-03 | 0.188 |
| 99  | <i>RAB3GAP1</i> | RAB3 GTPase activating protein catalytic subunit 1                     | other                      | 10.600 | 1.21E-03 | 0.085 |
| 100 | <i>H2AC13</i>   | H2A clustered histone 13                                               | other                      | 10.576 | 2.72E-05 | 0.032 |

*Blue molecules* are molecules that have previously been mentioned in psoriasis, either their mRNA or their proteins based on QIAGEN Knowledge Base as of October 2021.

\*Molecule types are classified into complex, cytokine, enzyme, fusion gene/product, G-protein coupled receptor, group, growth factor, ion channel, kinase, ligand-dependent nuclear receptor, mature microRNA, peptidase, phosphatase, transcription regulator, translation regulator, transmembrane receptor and transporter. None of these were classified as other. DEGs, differentially expressed genes; FC, fold change.

**Supplementary Table S2** The top-100 downregulated DEGs by log2FC.

|    | Gene symbol       | Gene title                                                       | Molecule type*          | Log 2FC | p-value   | FDR   |
|----|-------------------|------------------------------------------------------------------|-------------------------|---------|-----------|-------|
| 1  | <i>ATP5F1A</i>    | ATP synthase F1 subunit alpha                                    | transporter             | -27.343 | 7.380E-04 | 0.072 |
| 2  | <i>SEPTIN5</i>    | septin 5                                                         | enzyme                  | -25.527 | 1.410E-03 | 0.089 |
| 3  | <i>KHNYN</i>      | KH and NYN domain containing                                     | other                   | -24.254 | 3.700E-03 | 0.130 |
| 4  | <i>PLD3</i>       | phospholipase D family member 3                                  | enzyme                  | -23.010 | 5.630E-03 | 0.153 |
| 5  | <i>FHL1</i>       | four and a half LIM domains 1                                    | other                   | -21.983 | 9.840E-03 | 0.193 |
| 6  | <i>HEXA</i>       | hexosaminidase subunit alpha                                     | enzyme                  | -20.826 | 8.320E-03 | 0.181 |
| 7  | <i>DNM2</i>       | dynamain 2                                                       | enzyme                  | -19.584 | 7.500E-03 | 0.172 |
| 8  | <i>TLE5</i>       | TLE family member 5, transcriptional modulator                   | transcription regulator | -18.613 | 3.990E-03 | 0.132 |
| 9  | <i>MYH14</i>      | myosin heavy chain 14                                            | enzyme                  | -16.846 | 1.460E-03 | 0.090 |
| 10 | <i>GSN</i>        | Gelsolin                                                         | other                   | -16.812 | 1.490E-03 | 0.091 |
| 11 | <i>SPSB3</i>      | spla/ryanodine receptor domain and SOCS box containing 3         | other                   | -16.593 | 1.100E-03 | 0.084 |
| 12 | <i>LCE1C</i>      | late cornified envelope 1C                                       | other                   | -16.153 | 1.620E-03 | 0.094 |
| 13 | <i>LAMTOR4</i>    | late endosomal/lysosomal adaptor, MAPK and MTOR activator 4      | other                   | -16.058 | 9.610E-05 | 0.037 |
| 14 | <i>SYT8</i>       | synaptotagmin 8                                                  | transporter             | -16.014 | 9.260E-03 | 0.189 |
| 15 | <i>LTBP4</i>      | latent transforming growth factor beta binding protein 4         | growth factor           | -15.985 | 2.600E-03 | 0.113 |
| 16 | <i>ITGB4</i>      | integrin subunit beta 4                                          | transmembrane receptor  | -15.717 | 3.270E-03 | 0.124 |
| 17 | <i>DCTN1</i>      | dynactin subunit 1                                               | other                   | -15.591 | 3.700E-03 | 0.130 |
| 18 | <i>RTN4</i>       | reticulon 4                                                      | other                   | -15.532 | 3.930E-03 | 0.132 |
| 19 | <i>CAMSAP3</i>    | calmodulin regulated spectrin associated protein family member 3 | other                   | -15.517 | 3.990E-03 | 0.132 |
| 20 | <i>NFIX</i>       | nuclear factor I X                                               | transcription regulator | -15.266 | 5.070E-03 | 0.146 |
| 21 | <i>CRAT</i>       | carnitine O-acetyltransferase                                    | enzyme                  | -15.226 | 4.210E-03 | 0.135 |
| 22 | <i>RAB40C</i>     | RAB40C, member RAS oncogene family                               | enzyme                  | -15.156 | 5.860E-03 | 0.156 |
| 23 | <i>CCL27</i>      | C-C motif chemokine ligand 27                                    | other                   | -15.021 | 3.820E-03 | 0.131 |
| 24 | <i>SIK1/SIK1B</i> | salt inducible kinase 1                                          | kinase                  | -14.994 | 6.560E-03 | 0.163 |
| 25 | <i>CAPG</i>       | capping actin protein, gelsolin like                             | other                   | -14.970 | 2.080E-04 | 0.045 |
| 26 | <i>EPN2</i>       | epsin 2                                                          | other                   | -14.879 | 7.780E-03 | 0.175 |
| 27 | <i>ARAP1</i>      | ArfGAP with RhoGAP domain, ankyrin repeat and PH domain 1        | other                   | -14.871 | 7.950E-03 | 0.177 |
| 28 | <i>PDCD4</i>      | programmed cell death 4                                          | other                   | -14.858 | 7.870E-03 | 0.176 |
| 29 | <i>XPO6</i>       | exportin 6                                                       | other                   | -14.735 | 9.330E-03 | 0.189 |
| 30 | <i>PODN</i>       | Podocan                                                          | other                   | -14.705 | 9.560E-03 | 0.190 |
| 31 | <i>TUBGCP2</i>    | tubulin gamma complex associated protein 2                       | peptidase               | -14.694 | 9.730E-03 | 0.192 |
| 32 | <i>CIRBP</i>      | cold inducible RNA binding protein                               | translation regulator   | -14.658 | 9.860E-03 | 0.193 |
| 33 | <i>TSPAN14</i>    | tetraspanin 14                                                   | other                   | -14.640 | 9.940E-03 | 0.193 |
| 34 | <i>ATP2B4</i>     | ATPase plasma membrane Ca2+ transporting 4                       | transporter             | -14.506 | 1.540E-03 | 0.092 |
| 35 | <i>CNOT1</i>      | CCR4-NOT transcription complex subunit 1                         | other                   | -14.414 | 8.590E-04 | 0.077 |
| 36 | <i>WBP2</i>       | WW domain binding protein 2                                      | transcription regulator | -14.403 | 3.680E-03 | 0.129 |
| 37 | <i>MAN2C1</i>     | mannosidase alpha class 2C member 1                              | enzyme                  | -14.324 | 2.770E-03 | 0.115 |
| 38 | <i>POLD2</i>      | DNA polymerase delta 2, accessory subunit                        | enzyme                  | -14.293 | 6.080E-04 | 0.068 |
| 39 | <i>MPST</i>       | mercaptopyruvate sulfurtransferase                               | enzyme                  | -14.237 | 5.410E-03 | 0.150 |
| 40 | <i>ACSS2</i>      | acyl-CoA synthetase short chain family member 2                  | enzyme                  | -14.029 | 4.050E-03 | 0.133 |
| 41 | <i>AP2A1</i>      | adaptor related protein complex 2 subunit alpha 1                | transporter             | -13.944 | 4.740E-03 | 0.142 |
| 42 | <i>SCRIB</i>      | scribble planar cell polarity protein                            | other                   | -13.900 | 6.080E-03 | 0.159 |
| 43 | <i>TAP2</i>       | transporter 2, ATP binding cassette subfamily B member           | transporter             | -13.808 | 6.590E-03 | 0.184 |
| 44 | <i>PHYHIP</i>     | phytanoyl-CoA 2-hydroxylase interacting protein                  | other                   | -13.783 | 6.750E-03 | 0.165 |
| 45 | <i>PLCH2</i>      | phospholipase C eta 2                                            | enzyme                  | -13.780 | 6.560E-03 | 0.163 |
| 46 | <i>TMEM63B</i>    | transmembrane protein 63B                                        | ion channel             | -13.617 | 6.260E-03 | 0.161 |
| 47 | <i>TAX1BP1</i>    | Tax1 binding protein 1                                           | other                   | -13.600 | 3.020E-03 | 0.121 |
| 48 | <i>PKM</i>        | pyruvate kinase M1/2                                             | kinase                  | -13.594 | 5.310E-03 | 0.149 |
| 49 | <i>EPHX3</i>      | epoxide hydrolase 3                                              | enzyme                  | -13.472 | 8.680E-03 | 0.184 |
| 50 | <i>PTBP1</i>      | polypyrimidine tract binding protein 1                           | enzyme                  | -13.167 | 8.660E-03 | 0.184 |
| 51 | <i>FCGRT</i>      | Fc fragment of IgG receptor and transporter                      | transmembrane receptor  | -13.037 | 6.690E-03 | 0.164 |
| 52 | <i>MARCHF2</i>    | membrane associated ring-CH-type finger 2                        | enzyme                  | -12.985 | 3.850E-03 | 0.132 |
| 53 | <i>RPS3</i>       | ribosomal protein S3                                             | enzyme                  | -12.891 | 4.110E-03 | 0.134 |
| 54 | <i>ZFYVE16</i>    | zinc finger FYVE-type containing 16                              | other                   | -12.664 | 1.810E-03 | 0.100 |

|     |                    |                                                                     |                         |         |           |       |
|-----|--------------------|---------------------------------------------------------------------|-------------------------|---------|-----------|-------|
| 55  | <i>TPPP3</i>       | tubulin polymerization promoting protein family member 3            | other                   | -12.098 | 7.770E-03 | 0.175 |
| 56  | <i>STUB1</i>       | STIP1 homology and U-box containing protein 1                       | enzyme                  | -11.875 | 6.210E-03 | 0.161 |
| 57  | <i>FBXO22</i>      | F-box protein 22                                                    | enzyme                  | -11.708 | 6.990E-03 | 0.167 |
| 58  | <i>MMP28</i>       | matrix metalloproteinase 28                                         | peptidase               | -11.574 | 7.540E-03 | 0.173 |
| 59  | <i>TMBIM6</i>      | transmembrane BAX inhibitor motif containing 6                      | other                   | -11.570 | 8.740E-04 | 0.077 |
| 60  | <i>STK25</i>       | serine/threonine kinase 25                                          | kinase                  | -10.319 | 3.940E-03 | 0.132 |
| 61  | <i>TAGLN2</i>      | transgelin 2                                                        | other                   | -9.939  | 8.500E-03 | 0.183 |
| 62  | <i>CFD</i>         | complement factor D                                                 | peptidase               | -9.500  | 8.790E-03 | 0.185 |
| 63  | <i>ESRRA</i>       | estrogen related receptor alpha                                     | transcription regulator | -9.499  | 9.520E-03 | 0.190 |
| 64  | <i>CYP11A1</i>     | cytochrome P450 family 1 subfamily A member 1                       | enzyme                  | -9.340  | 4.600E-04 | 0.064 |
| 65  | <i>LORICRIN</i>    | loricrin cornified envelope precursor protein                       | other                   | -9.244  | 8.540E-04 | 0.077 |
| 66  | <i>ABHD16A</i>     | abhydrolase domain containing 16A, phospholipase                    | enzyme                  | -9.026  | 6.300E-03 | 0.161 |
| 67  | <i>ATP6V0B</i>     | ATPase H <sup>+</sup> transporting V0 subunit b                     | transporter             | -8.566  | 2.600E-03 | 0.113 |
| 68  | <i>HS3ST6</i>      | heparan sulfate-glucosamine 3-sulfotransferase 6                    | enzyme                  | -8.404  | 1.380E-03 | 0.089 |
| 69  | <i>RBM10</i>       | RNA binding motif protein 10                                        | other                   | -8.066  | 3.500E-03 | 0.127 |
| 70  | <i>EEF1D</i>       | eukaryotic translation elongation factor 1 delta                    | translation regulator   | -7.844  | 2.260E-03 | 0.107 |
| 71  | <i>CAMTA2</i>      | calmodulin binding transcription activator 2                        | transcription regulator | -7.756  | 4.210E-03 | 0.135 |
| 72  | <i>ALDOA</i>       | aldolase, fructose-bisphosphate A                                   | enzyme                  | -7.337  | 5.810E-03 | 0.156 |
| 73  | <i>SOD3</i>        | superoxide dismutase 3                                              | enzyme                  | -7.189  | 1.040E-03 | 0.082 |
| 74  | <i>RPL37A</i>      | ribosomal protein L37a                                              | other                   | -6.625  | 1.230E-04 | 0.038 |
| 75  | <i>DNM1</i>        | dynamitin 1                                                         | enzyme                  | -6.623  | 4.020E-03 | 0.133 |
| 76  | <i>HBA1/HBA2</i>   | hemoglobin subunit alpha 2                                          | transporter             | -6.558  | 9.540E-04 | 0.081 |
| 77  | <i>WDR61</i>       | WD repeat domain 61                                                 | other                   | -6.552  | 9.740E-03 | 0.192 |
| 78  | <i>CYTH2</i>       | cytohesin 2                                                         | other                   | -6.374  | 6.880E-03 | 0.166 |
| 79  | <i>ISLR</i>        | immunoglobulin superfamily containing leucine rich repeat           | other                   | -6.159  | 1.070E-03 | 0.083 |
| 80  | <i>BGN</i>         | Biglycan                                                            | other                   | -6.158  | 1.160E-04 | 0.038 |
| 81  | <i>TBC1D9B</i>     | TBC1 domain family member 9B                                        | other                   | -6.146  | 5.440E-03 | 0.150 |
| 82  | <i>KLK11</i>       | kallikrein related peptidase 11                                     | peptidase               | -5.992  | 2.640E-05 | 0.032 |
| 83  | <i>NDUFS2</i>      | NADH:ubiquinone oxidoreductase core subunit S2                      | enzyme                  | -5.760  | 9.890E-04 | 0.081 |
| 84  | <i>ACOT1</i>       | acyl-CoA thioesterase 1                                             | enzyme                  | -5.732  | 5.860E-03 | 0.156 |
| 85  | <i>RPS16</i>       | ribosomal protein S16                                               | other                   | -5.663  | 5.190E-04 | 0.065 |
| 86  | <i>CCDC85B</i>     | coiled-coil domain containing 85B                                   | other                   | -5.655  | 4.340E-04 | 0.064 |
| 87  | <i>MAP1LC3A</i>    | microtubule associated protein 1 light chain 3 alpha                | other                   | -5.542  | 8.650E-03 | 0.184 |
| 88  | <i>ARL6IP4</i>     | ADP ribosylation factor like GTPase 6 interacting protein 4         | other                   | -5.529  | 9.630E-03 | 0.191 |
| 89  | <i>ZNF358</i>      | zinc finger protein 358                                             | transcription regulator | -5.485  | 3.630E-03 | 0.129 |
| 90  | <i>KRT2</i>        | keratin 2                                                           | other                   | -5.484  | 9.530E-04 | 0.081 |
| 91  | <i>GJB3</i>        | gap junction protein beta 3                                         | transporter             | -5.454  | 9.220E-03 | 0.189 |
| 92  | <i>RPL39</i>       | ribosomal protein L39                                               | other                   | -5.442  | 2.660E-04 | 0.050 |
| 93  | <i>DMKN</i>        | Dermokine                                                           | other                   | -5.425  | 8.230E-05 | 0.037 |
| 94  | <i>IGFBP6</i>      | insulin like growth factor binding protein 6                        | other                   | -5.399  | 1.260E-03 | 0.086 |
| 95  | <i>LCE2C/LCE2D</i> | late cornified envelope 2D                                          | other                   | -5.366  | 9.450E-04 | 0.081 |
| 96  | <i>LY6G6C</i>      | lymphocyte antigen 6 family member G6C                              | other                   | -5.365  | 4.260E-05 | 0.033 |
| 97  | <i>PPDPF</i>       | pancreatic progenitor cell differentiation and proliferation factor | other                   | -5.360  | 1.680E-05 | 0.032 |
| 98  | <i>S100A16</i>     | S100 calcium binding protein A16                                    | other                   | -5.334  | 9.920E-03 | 0.193 |
| 99  | <i>SCAMP4</i>      | secretory carrier membrane protein 4                                | other                   | -5.266  | 4.040E-03 | 0.133 |
| 100 | <i>NOP53</i>       | NOP53 ribosome biogenesis factor                                    | other                   | -5.102  | 3.280E-05 | 0.032 |

*Blue molecules* are molecules that have previously been mentioned in psoriasis, either their mRNA or their proteins based on QIAGEN Knowledge Base as of October 2021.

\*Molecule types are classified into complex, cytokine, enzyme, fusion gene/product, G-protein coupled receptor, group, growth factor, ion channel, kinase, ligand-dependent nuclear receptor, mature microRNA, peptidase, phosphatase, transcription regulator, translation regulator, transmembrane receptor and transporter. None of these were classified as other. DEGs, differentially expressed genes; FC, fold change.

### 1.3. Disease associations and biological functions

**Supplementary Table S3.** The psoriasis-associated genes with their expression (upregulation or downregulation) in peripheral edge of lesional skin.

|                         | Gene symbol                         | Gene title                                                                 | Molecule type*          | Log2FC | p-value  | FDR   |
|-------------------------|-------------------------------------|----------------------------------------------------------------------------|-------------------------|--------|----------|-------|
| <b>Upregulated DEGs</b> |                                     |                                                                            |                         |        |          |       |
| 1                       | <i>A2M</i>                          | alpha-2-macroglobulin                                                      | transporter             | 15.982 | 7.38E-04 | 0.072 |
| 2                       | <i>HERC6</i>                        | HECT and RLD domain containing E3 ubiquitin protein ligase family member 6 | enzyme                  | 14.724 | 1.41E-03 | 0.089 |
| 3                       | <i>DEFB4A/</i><br><i>DEFB4B</i>     | defensin beta 4A                                                           | other                   | 14.690 | 3.70E-03 | 0.130 |
| 4                       | <i>HRNR</i>                         | Hornerin                                                                   | other                   | 14.597 | 5.63E-03 | 0.153 |
| 5                       | <i>IL36A</i>                        | interleukin 36 alpha                                                       | cytokine                | 14.572 | 9.84E-03 | 0.193 |
| 6                       | <i>SPRR2C</i>                       | small proline rich protein 2C (pseudogene)                                 | other                   | 12.058 | 8.32E-03 | 0.181 |
| 7                       | <i>TWF1</i>                         | twinfilin actin binding protein 1                                          | kinase                  | 10.854 | 7.50E-03 | 0.172 |
| 8                       | <i>TNIP3</i>                        | TNFAIP3 interacting protein 3                                              | other                   | 10.794 | 3.99E-03 | 0.132 |
| 9                       | <i>SERPINB4</i>                     | serpin family B member 4                                                   | other                   | 10.691 | 1.46E-03 | 0.090 |
| 10                      | <i>CXCL8</i>                        | C-X-C motif chemokine ligand 8                                             | cytokine                | 10.681 | 1.49E-03 | 0.091 |
| 11                      | <i>ADAR</i>                         | adenosine deaminase RNA specific                                           | enzyme                  | 9.663  | 1.10E-03 | 0.084 |
| 12                      | <i>S100A7A</i>                      | S100 calcium binding protein A7A                                           | other                   | 9.559  | 1.62E-03 | 0.094 |
| 13                      | <i>DBN1</i>                         | drebrin 1                                                                  | other                   | 8.059  | 9.61E-05 | 0.037 |
| 14                      | <i>SERPINB3</i>                     | serpin family B member 3                                                   | other                   | 7.630  | 9.26E-03 | 0.189 |
| 15                      | <i>DEFB103A/</i><br><i>DEFB103B</i> | defensin beta 103B                                                         | other                   | 7.624  | 2.60E-03 | 0.113 |
| 16                      | <i>ALDH1A3</i>                      | aldehyde dehydrogenase 1 family member A3                                  | enzyme                  | 6.628  | 3.27E-03 | 0.124 |
| 17                      | <i>DSC2</i>                         | desmocollin 2                                                              | other                   | 6.595  | 3.70E-03 | 0.130 |
| 18                      | <i>SLC6A14</i>                      | solute carrier family 6 member 14                                          | transporter             | 6.106  | 3.93E-03 | 0.132 |
| 19                      | <i>KRT6A</i>                        | keratin 6A                                                                 | other                   | 5.740  | 3.99E-03 | 0.132 |
| 20                      | <i>TCN1</i>                         | transcobalamin 1                                                           | transporter             | 5.702  | 5.07E-03 | 0.146 |
| 21                      | <i>GJB2</i>                         | gap junction protein beta 2                                                | transporter             | 5.468  | 4.21E-03 | 0.135 |
| 22                      | <i>LCE3C</i>                        | late cornified envelope 3C                                                 | other                   | 5.451  | 5.86E-03 | 0.156 |
| 23                      | <i>SOD2</i>                         | superoxide dismutase 2                                                     | enzyme                  | 5.415  | 3.82E-03 | 0.131 |
| 24                      | <i>KRT6C</i>                        | keratin 6C                                                                 | other                   | 5.310  | 6.56E-03 | 0.163 |
| 25                      | <i>PI3</i>                          | peptidase inhibitor 3                                                      | other                   | 5.139  | 2.08E-04 | 0.045 |
| 26                      | <i>RSAD2</i>                        | radical S-adenosyl methionine domain containing 2                          | enzyme                  | 5.056  | 7.78E-03 | 0.175 |
| 27                      | <i>S100A8</i>                       | S100 calcium binding protein A8                                            | other                   | 4.944  | 7.95E-03 | 0.177 |
| 28                      | <i>S100A9</i>                       | S100 calcium binding protein A9                                            | other                   | 4.722  | 7.87E-03 | 0.176 |
| 29                      | <i>KRT16</i>                        | keratin 16                                                                 | other                   | 4.675  | 9.33E-03 | 0.189 |
| 30                      | <i>IFI44L</i>                       | interferon induced protein 44 like                                         | other                   | 4.571  | 9.56E-03 | 0.190 |
| 31                      | <i>SPRR2A</i>                       | small proline rich protein 2A                                              | other                   | 4.512  | 9.73E-03 | 0.192 |
| 32                      | <i>IFI44</i>                        | interferon induced protein 44                                              | other                   | 4.398  | 9.86E-03 | 0.193 |
| 33                      | <i>PLAT</i>                         | plasminogen activator, tissue type                                         | peptidase               | 4.388  | 9.94E-03 | 0.193 |
| 34                      | <i>KLK7</i>                         | kallikrein related peptidase 7                                             | peptidase               | 4.224  | 1.54E-03 | 0.092 |
| 35                      | <i>LCN2</i>                         | lipocalin 2                                                                | transporter             | 4.182  | 8.59E-04 | 0.077 |
| 36                      | <i>HAL</i>                          | histidine ammonia-lyase                                                    | enzyme                  | 4.097  | 3.68E-03 | 0.129 |
| 37                      | <i>TXNIP</i>                        | thioredoxin interacting protein                                            | other                   | 3.996  | 2.77E-03 | 0.115 |
| 38                      | <i>HIF1A</i>                        | hypoxia inducible factor 1 subunit alpha                                   | transcription regulator | 3.970  | 6.08E-04 | 0.068 |
| 39                      | <i>KLK6</i>                         | kallikrein related peptidase 6                                             | peptidase               | 3.927  | 5.41E-03 | 0.150 |
| 40                      | <i>NAMPT</i>                        | nicotinamide phosphoribosyltransferase                                     | cytokine                | 3.919  | 4.05E-03 | 0.133 |
| 41                      | <i>IL36G</i>                        | interleukin 36 gamma                                                       | cytokine                | 3.897  | 4.74E-03 | 0.142 |
| 42                      | <i>TRIM22</i>                       | tripartite motif containing 22                                             | transcription regulator | 3.779  | 6.08E-03 | 0.159 |
| 43                      | <i>APOL6</i>                        | apolipoprotein L6                                                          | transporter             | 3.776  | 8.59E-03 | 0.184 |
| 44                      | <i>DSG3</i>                         | desmoglein 3                                                               | other                   | 3.599  | 6.75E-03 | 0.165 |
| 45                      | <i>ALDH3A2</i>                      | aldehyde dehydrogenase 3 family member A2                                  | enzyme                  | 3.457  | 6.56E-03 | 0.163 |
| 46                      | <i>KRT6B</i>                        | keratin 6B                                                                 | other                   | 3.384  | 6.26E-03 | 0.161 |

|                           |                 |                                                              |                         |         |          |       |
|---------------------------|-----------------|--------------------------------------------------------------|-------------------------|---------|----------|-------|
| 47                        | <i>STAT1</i>    | signal transducer and activator of transcription 1           | transcription regulator | 3.384   | 3.02E-03 | 0.121 |
| 48                        | <i>OASL</i>     | 2'-5'-oligoadenylate synthetase like                         | enzyme                  | 3.355   | 5.31E-03 | 0.149 |
| 49                        | <i>HSPA8</i>    | heat shock protein family A (Hsp70) member 8                 | enzyme                  | 3.271   | 8.68E-03 | 0.184 |
| 50                        | <i>OAS3</i>     | 2'-5'-oligoadenylate synthetase 3                            | enzyme                  | 3.202   | 8.66E-03 | 0.184 |
| 51                        | <i>SPTLC2</i>   | serine palmitoyltransferase long chain base subunit 2        | enzyme                  | 3.022   | 6.69E-03 | 0.164 |
| 52                        | <i>S100A7</i>   | S100 calcium binding protein A7                              | other                   | 3.002   | 3.85E-03 | 0.132 |
| 53                        | <i>MAPK6</i>    | mitogen-activated protein kinase 6                           | kinase                  | 2.918   | 4.11E-03 | 0.134 |
| 54                        | <i>SLC23A2</i>  | solute carrier family 23 member 2                            | transporter             | 2.675   | 1.81E-03 | 0.100 |
| 55                        | <i>LCE3E</i>    | late cornified envelope 3E                                   | other                   | 2.652   | 7.77E-03 | 0.175 |
| 56                        | <i>CCND2</i>    | cyclin D2                                                    | other                   | 2.609   | 6.21E-03 | 0.161 |
| 57                        | <i>ARHGDIA</i>  | Rho GDP dissociation inhibitor alpha                         | other                   | 2.608   | 6.99E-03 | 0.167 |
| 58                        | <i>CTSL</i>     | cathepsin L                                                  | peptidase               | 2.592   | 7.54E-03 | 0.173 |
| 59                        | <i>C10orf99</i> | chromosome 10 open reading frame 99                          | cytokine                | 2.567   | 8.74E-04 | 0.077 |
| 60                        | <i>METAP2</i>   | methionyl aminopeptidase 2                                   | peptidase               | 2.561   | 3.94E-03 | 0.132 |
| 61                        | <i>GBP1</i>     | guanylate binding protein 1                                  | enzyme                  | 2.533   | 8.50E-03 | 0.183 |
| 62                        | <i>CRABP2</i>   | cellular retinoic acid binding protein 2                     | transporter             | 2.480   | 8.79E-03 | 0.185 |
| 63                        | <i>DSG1</i>     | desmoglein 1                                                 | other                   | 2.456   | 9.52E-03 | 0.190 |
| 64                        | <i>ARG1</i>     | arginase 1                                                   | enzyme                  | 2.416   | 4.60E-04 | 0.064 |
| 65                        | <i>PLSCR1</i>   | phospholipid scramblase 1                                    | enzyme                  | 2.352   | 8.54E-04 | 0.077 |
| 66                        | <i>TGM1</i>     | transglutaminase 1                                           | enzyme                  | 2.320   | 6.30E-03 | 0.161 |
| 67                        | <i>TOP1</i>     | DNA topoisomerase I                                          | enzyme                  | 2.223   | 2.60E-03 | 0.113 |
| 68                        | <i>CLCA2</i>    | chloride channel accessory 2                                 | ion channel             | 2.192   | 1.38E-03 | 0.089 |
| 69                        | <i>GM2A</i>     | GM2 ganglioside activator                                    | enzyme                  | 2.155   | 3.50E-03 | 0.127 |
| 70                        | <i>ADAM17</i>   | ADAM metallopeptidase domain 17                              | peptidase               | 2.146   | 2.26E-03 | 0.107 |
| 71                        | <i>FLG</i>      | Filaggrin                                                    | other                   | 2.135   | 4.21E-03 | 0.135 |
| 72                        | <i>LDLR</i>     | low density lipoprotein receptor                             | transporter             | 2.126   | 5.81E-03 | 0.156 |
| 73                        | <i>CRYBG1</i>   | crystallin beta-gamma domain containing 1                    | other                   | 2.050   | 1.04E-03 | 0.082 |
| 74                        | <i>CD47</i>     | CD47 molecule                                                | transmembrane receptor  | 2.002   | 1.23E-04 | 0.038 |
| 75                        | <i>CYCS</i>     | cytochrome c, somatic                                        | enzyme                  | 1.988   | 4.02E-03 | 0.133 |
| 76                        | <i>ME1</i>      | malic enzyme 1                                               | enzyme                  | 1.905   | 9.54E-04 | 0.081 |
| 77                        | <i>SYNCRIP</i>  | synaptotagmin binding cytoplasmic RNA interacting protein    | other                   | 1.867   | 9.74E-03 | 0.192 |
| 78                        | <i>DDX58</i>    | DEx/D/H-box helicase 58                                      | enzyme                  | 1.827   | 6.88E-03 | 0.166 |
| 79                        | <i>SQLE</i>     | squalene epoxidase                                           | enzyme                  | 1.790   | 1.07E-03 | 0.083 |
| 80                        | <i>IDH3A</i>    | isocitrate dehydrogenase (NAD (+)) 3 catalytic subunit alpha | enzyme                  | 1.736   | 1.16E-04 | 0.038 |
| 81                        | <i>PTP4A1</i>   | protein tyrosine phosphatase 4A1                             | phosphatase             | 1.736   | 5.44E-03 | 0.150 |
| 82                        | <i>FGFBP1</i>   | fibroblast growth factor binding protein 1                   | other                   | 1.728   | 2.64E-05 | 0.032 |
| 83                        | <i>LAMA2</i>    | laminin subunit alpha 2                                      | other                   | 1.626   | 9.89E-04 | 0.081 |
| 84                        | <i>IGFBP3</i>   | insulin like growth factor binding protein 3                 | other                   | 1.600   | 5.86E-03 | 0.156 |
| 85                        | <i>KPNB1</i>    | karyopherin subunit beta 1                                   | other                   | 1.541   | 5.19E-04 | 0.065 |
| 86                        | <i>SPRR2D</i>   | small proline rich protein 2D                                | other                   | 1.524   | 4.34E-04 | 0.064 |
| <b>Downregulated DEGs</b> |                 |                                                              |                         |         |          |       |
| 87                        | <i>GSN</i>      | Gelsolin                                                     | other                   | -16.812 | 1.49E-03 | 0.091 |
| 88                        | <i>LCE1C</i>    | late cornified envelope 1C                                   | other                   | -16.153 | 1.62E-03 | 0.094 |
| 89                        | <i>ITGB4</i>    | integrin subunit beta 4                                      | transmembrane receptor  | -15.717 | 3.27E-03 | 0.124 |
| 90                        | <i>CRAT</i>     | carnitine O-acetyltransferase                                | enzyme                  | -15.226 | 4.21E-03 | 0.135 |
| 91                        | <i>CCL27</i>    | C-C motif chemokine ligand 27                                | other                   | -15.021 | 3.82E-03 | 0.131 |
| 92                        | <i>PLCH2</i>    | phospholipase C eta 2                                        | enzyme                  | -13.780 | 6.56E-03 | 0.163 |
| 93                        | <i>PKM</i>      | pyruvate kinase M1/2                                         | kinase                  | -13.594 | 5.31E-03 | 0.149 |
| 94                        | <i>CFD</i>      | complement factor D                                          | peptidase               | -9.500  | 8.79E-03 | 0.185 |
| 95                        | <i>CYP1A1</i>   | cytochrome P450 family 1 subfamily A member 1                | enzyme                  | -9.340  | 4.60E-04 | 0.064 |
| 96                        | <i>LORICRIN</i> | loricrin cornified envelope precursor protein                | other                   | -9.244  | 8.54E-04 | 0.077 |
| 97                        | <i>KLK11</i>    | kallikrein related peptidase 11                              | peptidase               | -5.992  | 2.64E-05 | 0.032 |
| 98                        | <i>KRT2</i>     | keratin 2                                                    | other                   | -5.484  | 9.53E-04 | 0.081 |



|     |                 |                                                                             |                                      |        |          |       |
|-----|-----------------|-----------------------------------------------------------------------------|--------------------------------------|--------|----------|-------|
| 99  | <i>LCE2B</i>    | late cornified envelope 2B                                                  | other                                | -4.689 | 6.28E-05 | 0.035 |
| 100 | <i>CLEC3B</i>   | C-type lectin domain family 3 member B                                      | other                                | -4.139 | 6.36E-04 | 0.069 |
| 101 | <i>APOD</i>     | apolipoprotein D                                                            | transporter                          | -3.864 | 2.21E-03 | 0.105 |
| 102 | <i>KRT1</i>     | keratin 1                                                                   | other                                | -3.700 | 3.25E-04 | 0.056 |
| 103 | <i>LGALS1</i>   | galectin 1                                                                  | other                                | -3.681 | 1.03E-03 | 0.082 |
| 104 | <i>WNT7B</i>    | Wnt family member 7B                                                        | other                                | -3.574 | 4.31E-03 | 0.136 |
| 105 | <i>KRT10</i>    | keratin 10                                                                  | other                                | -3.521 | 1.51E-04 | 0.039 |
| 106 | <i>TUBB</i>     | tubulin beta class I                                                        | other                                | -3.389 | 1.37E-04 | 0.038 |
| 107 | <i>PSORS1C2</i> | psoriasis susceptibility 1 candidate 2                                      | other                                | -3.373 | 8.36E-03 | 0.182 |
| 108 | <i>CSTB</i>     | cystatin B                                                                  | peptidase                            | -3.325 | 3.26E-03 | 0.124 |
| 109 | <i>APOE</i>     | apolipoprotein E                                                            | transporter                          | -3.300 | 6.71E-03 | 0.164 |
| 110 | <i>GSK3A</i>    | glycogen synthase kinase 3 alpha                                            | kinase                               | -3.142 | 1.57E-03 | 0.093 |
| 111 | <i>TIMP2</i>    | TIMP metalloproteinase inhibitor 2                                          | other                                | -3.092 | 3.82E-04 | 0.060 |
| 112 | <i>RARG</i>     | retinoic acid receptor gamma                                                | ligand-dependent<br>nuclear receptor | -2.947 | 2.98E-03 | 0.120 |
| 113 | <i>CDHR1</i>    | cadherin related family member 1                                            | other                                | -2.931 | 3.27E-03 | 0.124 |
| 114 | <i>CST6</i>     | cystatin E/M                                                                | other                                | -2.930 | 9.37E-03 | 0.189 |
| 115 | <i>CTNNBIP1</i> | catenin beta interacting protein 1                                          | other                                | -2.866 | 6.26E-03 | 0.161 |
| 116 | <i>ID4</i>      | inhibitor of DNA binding 4, HLH protein                                     | transcription regulator              | -2.564 | 4.77E-03 | 0.143 |
| 117 | <i>IER2</i>     | immediate early response 2                                                  | transcription regulator              | -2.344 | 3.55E-03 | 0.128 |
| 118 | <i>TNXB</i>     | tenascin XB                                                                 | other                                | -2.238 | 2.46E-03 | 0.112 |
| 119 | <i>CALML5</i>   | calmodulin like 5                                                           | other                                | -2.153 | 6.69E-04 | 0.070 |
| 120 | <i>LAMA5</i>    | laminin subunit alpha 5                                                     | other                                | -2.125 | 7.10E-03 | 0.167 |
| 121 | <i>CAV1</i>     | caveolin 1                                                                  | transmembrane<br>receptor            | -2.121 | 5.43E-03 | 0.150 |
| 122 | <i>RER1</i>     | retention in endoplasmic reticulum sorting receptor 1                       | other                                | -2.106 | 2.64E-03 | 0.113 |
| 123 | <i>SULT2B1</i>  | sulfotransferase family 2B member 1                                         | enzyme                               | -2.104 | 3.75E-04 | 0.059 |
| 124 | <i>FKBP1A</i>   | FKBP prolyl isomerase 1A                                                    | enzyme                               | -2.042 | 4.09E-03 | 0.133 |
| 125 | <i>OTUB1</i>    | OTU deubiquitinase, ubiquitin aldehyde binding 1                            | enzyme                               | -2.021 | 8.23E-03 | 0.180 |
| 126 | <i>TYK2</i>     | tyrosine kinase 2                                                           | kinase                               | -1.915 | 5.78E-03 | 0.156 |
| 127 | <i>CTSK</i>     | cathepsin K                                                                 | peptidase                            | -1.893 | 4.34E-03 | 0.136 |
| 128 | <i>MIF</i>      | macrophage migration inhibitory factor                                      | cytokine                             | -1.842 | 4.86E-03 | 0.144 |
| 129 | <i>CCND1</i>    | cyclin D1                                                                   | transcription regulator              | -1.827 | 4.37E-03 | 0.137 |
| 130 | <i>IL20RB</i>   | interleukin 20 receptor subunit beta                                        | other                                | -1.788 | 2.68E-03 | 0.114 |
| 131 | <i>SLC25A5</i>  | solute carrier family 25 member 5                                           | transporter                          | -1.642 | 3.22E-03 | 0.123 |
| 132 | <i>IGFBP7</i>   | insulin like growth factor binding protein 7                                | transporter                          | -1.574 | 6.94E-03 | 0.166 |
| 133 | <i>YWHA</i>     | tyrosine 3-monooxygenase/tryptophan 5-monooxygenase activation protein beta | other                                | -1.562 | 7.05E-03 | 0.167 |
| 134 | <i>UQCRC1</i>   | ubiquinol-cytochrome c reductase, Rieske iron-sulfur polypeptide 1          | enzyme                               | -1.560 | 6.06E-03 | 0.159 |
| 135 | <i>PKP1</i>     | plakophilin 1                                                               | other                                | -1.523 | 2.28E-03 | 0.107 |

The information was based on QIAGEN Knowledge Base as of October 2021.

\*Molecule types are classified into complex, cytokine, enzyme, fusion gene/product, G-protein coupled receptor, group, growth factor, ion channel, kinase, ligand-dependent nuclear receptor, mature microRNA, peptidase, phosphatase, transcription regulator, translation regulator, transmembrane receptor and transporter. None of these were classified as other. DEGs, differentially expressed genes; FC, fold change.



**Supplementary Table S5** Lists of upregulated DEGs in each pathway or function.

| GO term       | Description                                   | Associated DEGs with upregulation in peripheral edge of lesional skin                                                                                                                                                                                                                                                                                                                                                                                                                                                                                                                                                                              |
|---------------|-----------------------------------------------|----------------------------------------------------------------------------------------------------------------------------------------------------------------------------------------------------------------------------------------------------------------------------------------------------------------------------------------------------------------------------------------------------------------------------------------------------------------------------------------------------------------------------------------------------------------------------------------------------------------------------------------------------|
| R-HSA-6809371 | Formation of the cornified envelope           | <i>AFDN, ALDH3A2, ASH1L, BMPR2, CLIC4, CRABP2, DSC1, DSC2, DSG1, DSG3, ERCC3, EREG, FAT1, FEM1B, FERMT1, FLG, FOSL2, GRHL1, HIF1A, HRNR, IKBKB, IQGAP1, JAG1, KDM5B, KIAA1109, KLK7, KRT16, KRT6A, KRT6B, KRT6C, LCE3A, LCE3C, LCE3E, MYO9A, NOTCH2, PI3, PLEC, PLOD1, PTK7, RHCG, RPTN, S100A7, SLC4A7, SLC7A11, SPINK5, SPRR2A, SPRR2D, SPRR2F, STAT1, TGM1, TNFRSF1A, TXNIP, UGCG, XDH, ZBED6</i>                                                                                                                                                                                                                                               |
| WP3888        | VEGFA-VEGFR2 signaling pathway                | <i>AFDN, ASCC3, CLIC1, CXCL8, CYBB, CYCS, DHX29, DSC1, EEA1, EIF4G2, EPRS1, FBXW11, FHL2, GIGYF2, IGFBP3, INPP5K, IQGAP1, ITCH, ITGB1, JAG1, LMAN1, LRRC59, MYH11, PNP, PRRC2C, PTPN11, RICTOR, SLC7A1, SOD2, SSR3, STAT1, STAT3, STIP1, TXNIP</i>                                                                                                                                                                                                                                                                                                                                                                                                 |
| R-HSA-199991  | Membrane trafficking                          | <i>ACBD3, ANK3, AP1M1, CD59, COPA, CTSC, DENND4C, DENND5A, EREG, GALNT2, GJB2, GJB6, HSPA8, ITSN2, KIF1B, KIF5B, KIFAP3, LDLR, LMAN1, MAN1A2, MAN2A1, MYO5A, PIK3C2A, PPP6C, PRKAG1, RAB27B, RAB3GAP1, RAB3GAP2, RIN2, SEC23A, SH3D19, STON2, TBC1D10A, TMF1, TRAPPC9, TRIP11, TUBB6, VPS52, WASL, YWHAZ</i>                                                                                                                                                                                                                                                                                                                                       |
| R-HSA-913531  | Interferon signaling                          | <i>ADAR, AKAP1, CLPB, DDX21, DDX58, EIF4G2, G3BP1, GBP1, GBP4, GBP5, GBP6, HIF1A, HLA-A, IFI44, IFI44L, IKBKB, ITCH, KPNB1, LYST, MX2, NT5C3A, NUP155, OAS3, OASL, PLSCR1, PTPN11, RANBP2, RSAD2, SAMHD1, SETD2, STAT1, TRAF3IP1, TRIM22, WDFY4, XAF1</i>                                                                                                                                                                                                                                                                                                                                                                                          |
| R-HSA-6798695 | Neutrophil degranulation                      | <i>AP1M1, ARG1, ATP11B, CAND1, CAPI, CD47, CD59, CDK13, CTSC, CYBB, CYFIP1, DSC1, DSG1, FRK, GLB1, GM2A, HLA-A, HRNR, HSPA8, HUWE1, IQGAP1, KPNB1, LCN2, LYZ, PLD1, PNP, PSMD12, S100A7, S100A8, S100A9, SERPINB3, TCN1</i>                                                                                                                                                                                                                                                                                                                                                                                                                        |
| R-HSA-6799990 | Metal sequestration by antimicrobial proteins | <i>ABCA1, ADAM17, ARG1, CD274, CXCL8, EDNRB, GJB2, GJB6, IKBKB, IL36A, IL36G, LCN2, LYZ, MAPK6, PI3, S100A7, S100A7A, S100A8, S100A9, SERPINB3, SOD2, THBS1, TNIP3, USP25</i>                                                                                                                                                                                                                                                                                                                                                                                                                                                                      |
| GO:0002831    | Regulation of response to biotic stimulus     | <i>A2M, ADAM17, ADAR, AHR, ARG1, ASH1L, CD274, CD47, CD59, CTSC, DDX21, DDX58, DLG1, EDNRB, EP300, EREG, GBP1, GBP5, HLA-A, IKBKB, ITCH, JAG1, KIF5B, KLK7, LDLR, LYST, MYO18A, NEAT1, NOTCH2, OAS3, OASL, PARP14, PLAT, PLEC, PLSCR1, PRKDC, PTGER3, PTPN11, RC3H1, RC3H2, RICTOR, RNF168, RSAD2, S100A8, S100A9, SAMHD1, SERPINB4, SERPINB9, SPINK5, STAT1, STAT3, SUPT6H, THBS1, TNFRSF1A, TRAF3IP1, VAV3, WASL, YES1</i>                                                                                                                                                                                                                       |
| GO:0048589    | Developmental growth                          | <i>BMPR2, CCNB1, CRABP2, DBN1, EIF4G2, EP300, EREG, ITGB1, NOTCH2, DDR2, PLEC, PRKDC, KLK6, PTK7, PTPN11, STAT3, STK3, TIAM1, USP9X, RASAL1, IQGAP1, SLC23A2, KDM5B, RUFY3, CYFIP1, MACF1, NIPBL, CLIC4, GIGYF2, ITSN2, NIN, RC3H2, CHD7, DIP2B, ASPM, FMN1, ANK3, KIF5B, LAMA2, MYH11, MYO9A, NEB, TMF1, TOP2B, TPM1, TRIO, TTN, WASL, MAP4K4, MYCBP2, EPB41L3, NGEF, TANC2, PARD3, TAOK1, FBXO45, H1-5, S100A8, S100A9, ADAM17, SMARCA4, ITCH, KIAA1109, DCUNID3, FAT1, GBP1, PEAK1, HIF1A, CLCN3, PLEK, VAV3, TMEM123, EDNRB, IKBKB, LDLR, MAN2A1, TNFRSF1A, SPEN, HOOK3, LCN2, ATP8B1, PLD1, TWF1, DENND5A, TBC1D22A, TBC1D10A, CTSC, DLG1</i> |
| GO:0006974    | Cellular response to DNA damage stimulus      | <i>ASCC3, ATR, BCLAF1, BOD1L1, CHD1L, EP300, ERCC3, FBXO45, FEM1B, GIGYF2, H1-1, H1-3, H1-4, H1-5, HERC2, HUWE1, INO80D, JMY, MAP3K20, MCM4, NABP1, NIPBL, PDS5A, PRKDC, PTPN11, RNF168, RNF169, SAMHD1, SETD2, SETD7, SMC5, SMC6, SMCHD1, SMG1, SUPT6H, TAF1, TAOK1, THOC5, TLK2, TNFRSF1A, TOP2B, TRIP12, UBA6, UBR5, USP45, VAV3, VCPIP1, WAC</i>                                                                                                                                                                                                                                                                                               |
| GO:0034330    | Cell junction organization                    | <i>ANK3, AFDN, AKAP11, CAST, CYFIP1, DBN1, DLG1, DSG1, EPB41L3, FBXO45, FMN1, FMNL2, GJB2, GJB6, GRHL1, HSPA8, IKBKB, IQGAP1, KIFC3, MACF1, MAP4K4, MYO9A, NGEF, PARD3, PCLO, PEAK1, PLEC, PLEK, PTPN11, PTPRK, SEPTIN11, SETD5, SLC7A11, SLK, STRN, TANC2, THBS1, TIAM1, VMPIWASL, YWHAZ</i>                                                                                                                                                                                                                                                                                                                                                      |
| GO:0048729    | Tissue morphogenesis                          | <i>ADAM17, ALDH1A3, ATP8B1, BMPR2, CCNA2, CHD7, CLIC4, CRYBG3, CYP7B1, DLG1, EXT2, FAT1, FEM1B, FERMT1, FMN1, GCNT4, GJB2, GJB6, HECTD1, HIF1A, ITGB1, JAG1, KDM5B, KRT16, KRT6A, LCN2, MAN2A1, MIB1, MYLK, MYO9A, NIPBL, NOTCH2, PRICKLE2, PTK7, PTPN11, RAB3GAP1, SETD2, SLC4A7, SLC7A11, SMARCA4, SMCHD1, STAT1, STAT3, STK3, TIAM1, TPM1, TRAF3IP1, TRIP11, TTN, USP45, VPS52</i>                                                                                                                                                                                                                                                              |

*The bold molecules* have not been previously mentioned in psoriasis. DEGs, differentially expressed genes.

CORUM, comprehensive resource of mammalian protein complexes; DEG, differentially expressed gene; GO, gene ontology; ko, Kyoto Encyclopedia of Genes and Genomes (KEGG) pathway; M, canonical pathways; R-HSA, reactome gene sets; WP, WikiPathways.

**Supplementary Table S6** Lists of downregulated DEGs in each pathway or function.

| GO term       | Description                            | Associated DEGs with downregulation in peripheral edge of lesional skin                                                                                                                                                                                                                                                                                                                                                                                                                                                                                                                                                                                                                                                                                                                                                  |
|---------------|----------------------------------------|--------------------------------------------------------------------------------------------------------------------------------------------------------------------------------------------------------------------------------------------------------------------------------------------------------------------------------------------------------------------------------------------------------------------------------------------------------------------------------------------------------------------------------------------------------------------------------------------------------------------------------------------------------------------------------------------------------------------------------------------------------------------------------------------------------------------------|
| GO:0030855    | Epithelial cell differentiation        | <i>ALDOC, ATF4, CAMSAP3, CASP14, CAV1, CCND1, CDKN1A, CLDN1, CYP1A1, EVPL, GPX1, GSK3A, HES1, KRT10, KRT2, LCE1A, CE1B, LCE1C, LCE1D, LCE1F, LCE2A, LCE2B, LCE6A, LORICRIN, NME2, PECAM1, POU3F1, PSAPL1, RAB1B, RAB25, RARG, SCRIB, SDC1, SH3BP1, SLC9A3R1, SULT2B1, TAGLN2, TPRN, TST, VIM, WNT7B, ZNF703</i>                                                                                                                                                                                                                                                                                                                                                                                                                                                                                                          |
| R-HSA-9006934 | Signaling by Receptor Tyrosine Kinases | <i>ACTB, AP2A1, AP2S1, APOE, ATP6AP1, ATP6V0B, ATP6V0C, ATP6V0E1, ATP6V1F, BRK1, CAV1, COL1A1, COL6A1, COL6A2, CSK, CYBA, DNMI, DNM2, FGFR3, HDAC3, HSPB1, ID4, LAMA5, MAP2K2, MAPK3, MXD4, NELFB, POLR2J, POLR2L, PTBP1, RAC1, RPS27A, SH3GL1, STUB1, UBA52, VEGFB, YWHAB</i>                                                                                                                                                                                                                                                                                                                                                                                                                                                                                                                                           |
| GO:0006914    | Autophagy                              | <i>ATP6V0B, ATP6V0C, ATP6V0E1, CAPNS1, CPTP, CSNK2A2, CTSK, DAPL1, DCN, EIF4G1, FIS1, GABARAP, GSK3A, HSPB1, ITGB4, MAP1LC3A, MAP1LC3B, MAPK3, NUPR1, PINK1, PYCARD, RAB1B, RRAGA, SLC25A5, SNRNP70, SREBF1, STUB1, TBC1D17, TM6IM6, TOMM7, TSPO, UBXN6, ULK1, VAMP8, VPS28, VPS51, WDR45</i>                                                                                                                                                                                                                                                                                                                                                                                                                                                                                                                            |
| R-HSA-6809371 | Formation of the cornified envelope    | <i>CAPNS1, CASP14, EVPL, KRT1, KRT10, KRT2, KRT77, LCE1A, LCE1B, LCE1C, LCE1D, LCE1F, LCE2A, LCE2B, LCE6A, LORICRIN, PKP1, PKP3, PRSS8</i>                                                                                                                                                                                                                                                                                                                                                                                                                                                                                                                                                                                                                                                                               |
| R-HSA-6798695 | Neutrophil degranulation               | <i>AGPAT2, ALDOA, ALDOC, ATP6V0C, CALML5, CFD, CST3, CSTB, CYBA, DEGS1, DPP7, FTH1, FTL, GSN, HEBP2, IST1, KRT1, MIF, NIT2, NME2, NPC2, PECAM1, PKM, PKP1, PSMD13, PSMD3, PYCARD, RAC1, TIMP2, TSPAN14, TUBB, TUBB4B, VAMP8, VAT1</i>                                                                                                                                                                                                                                                                                                                                                                                                                                                                                                                                                                                    |
| R-HSA-1474244 | Extracellular matrix organization      | <i>ADAM15, ATP2B4, BGN, CAPNS1, CD151, CD81, COL16A1, COL1A1, COL6A1, COL6A2, COL7A1, COMP, CRTAP, CTSK, CYBA, DCN, FBLN1, FBLN5, IGSF8, ITGB4, ITGB5, LAMA5, LAMTOR4, LTBP4, MAPK3, PCOLCE, PECAM1, RAC1, RRAGA, SDC1, SDC4, TGFB1, TIMP1, TIMP2, TM6IM6, TNXB</i>                                                                                                                                                                                                                                                                                                                                                                                                                                                                                                                                                      |
| R-HSA-9711123 | Cellular response to chemical stress   | <i>ACTB, AP2A1, AP2S1, APOE, ARF1, ARL2, ATF4, BLMH, BOC, CALML5, CAV1, CCND1, CD74, CD81, CDC34, CDKN1A, CHTF8, COL1A1, COX5A, COX6B1, COX7C, COX8A, CSK, CSNK1G2, CSNK2A2, CTBP1, CTNNBIP1, CTSF, CTSK, CYBA, DCTN1, DDB2, DNMI, DNM2, EE1G, EIF4G1, EMD, ESRR4, FBXO22, FBXO31, FGFR3, FKBP1A, FKBP8, GNAS, GNB2, GPX1, GSK3A, GSN, HDAC3, HES1, HSPB1, IL20RB, IST1, ITGB5, KAT2A, KLC3, LAMA5, LAMTOR4, MAP2K2, MAP3K11, MAPK3, MIF, MRC2, MZT2B, NDUFA4, NELFB, NPDC1, ORA11, OTUB1, PDCD4, PFN1, PKP1, POLD2, POLR2J, POLR2L, PRDX2, PSMB4, PSMC5, PSMD13, PSMD3, PYCARD, RAB1B, RAC1, RPS27, RPS27A, RRAGA, RTN3, RTN4, SCRIB, SDC1, SEPTIN5, SLC25A5, SOD3, SPSB3, STAP2, STUB1, TAP2, TEAD3, TIMP1, TLE5, TUBB, TUBB4B, TUBGCP2, TXN2, TYK2, UBA52, UBE2J2, ULK1, VAMP8, VIM, VPS28, WNT7B, YWHAB, ZNF385A</i> |
| WP3888        | VEGFA-VEGFR2 signaling pathway         | <i>ALDOA, AP2A1, AP2S1, ATF4, CAV1, CCDC124, CCND1, CSK, EIF3F, EIF4G1, GPC1, GPX1, HSPB1, IGFBP7, ITGB5, MAP2K2, MAPK3, PFN1, PRDX2, RAC1, RACK1, RPL10A, RPL18A, RPL27, RPL5, RPL7, RPLP2, RPS11, SH3BGRL3, TNXB</i>                                                                                                                                                                                                                                                                                                                                                                                                                                                                                                                                                                                                   |

**The bold molecules** have not been previously mentioned in psoriasis. DEGs, differentially expressed genes.

CORUM, comprehensive resource of mammalian protein complexes; DEG, differentially expressed gene; GO, gene ontology; ko, Kyoto Encyclopedia of Genes and Genomes (KEGG) pathway; M, canonical pathways; R-HSA, reactome gene sets; WP, WikiPathways.

**Supplementary Table S7** Comparison of PE/UN DEGs with those reported in previous studies.

| Year      | Author And Reference | Sample for DEGs                                                        | Method ology                         | Key messages                                                                                                                                                                                                                                                            | Sample of upregulated DEGs                                                                                                                                                                                                                                                                                                   | Sample of downregulated DEGs                                                                                                                                                                                                                                                                                  |
|-----------|----------------------|------------------------------------------------------------------------|--------------------------------------|-------------------------------------------------------------------------------------------------------------------------------------------------------------------------------------------------------------------------------------------------------------------------|------------------------------------------------------------------------------------------------------------------------------------------------------------------------------------------------------------------------------------------------------------------------------------------------------------------------------|---------------------------------------------------------------------------------------------------------------------------------------------------------------------------------------------------------------------------------------------------------------------------------------------------------------|
| 2012, Jan | Jabbari et al.[1]    | Lesional (LS) skin vs uninvolved (UN) skin                             | Whole-tissue RNA-seq                 | 1) 1 <sup>st</sup> Set of RNA-seq-derived DEGs (N=3) were compared with previously published microarray-derived DEGs (N=116).<br><br>2) The result uncovered DEGs which had not been revealed by microarray and supported IL-17 and TNF- $\alpha$ synergy in psoriasis. | <i>GPR110</i> , <i>SPRR2A</i> , <i>HEPHL1</i> , <i>CLEC3A</i> , <i>CD274</i> , <i>SPRR2E</i>                                                                                                                                                                                                                                 | <i>DIRAS2</i> , <i>LRRC3B</i> , <i>DBX2</i> , <i>KRT25</i> , <i>PERF15</i> , and <i>DDX25</i>                                                                                                                                                                                                                 |
| 2014, Jul | Li et al.[2]         | LS skin vs healthy skin                                                | Whole-tissue RNA-seq                 | This study revealed the DEGs involved in Myeloid cells, T-cells and Keratinocytes. RNA-seq can uncover low expressed transcripts.                                                                                                                                       | <i>AKR1B10</i> , <i>CXCL13</i> , <i>CXCL8</i> , <i>DEFB4A</i> , <i>GDA</i> , <i>HEPHL1</i> , <i>LCE3A</i> , <i>PI3</i> , <i>S100A12</i> , <i>S100A7</i> , <i>S100A7A</i> , <i>S100A8</i> , <i>S100A9</i> , <i>SERPINB3</i> , <i>SERPINB4</i> , <i>SPRR2A</i> , <i>SPRR2F</i> , <i>TCN1</i> , <i>TMPRSS11D</i> , <i>TNIP3</i> | <i>AADACL3</i> , <i>PM20D1</i> , <i>DGAT2L6</i> , <i>AWAT2</i> , <i>AWAT1</i> , <i>PNPLA5</i> , <i>ROS1</i> , <i>GAL</i> , <i>CYP2W1</i> , <i>UGT3A2</i> , <i>C10orf129</i> , <i>PDE6A</i> , <i>BTC</i> , <i>TRIM55</i> , <i>WIF1</i> , <i>ELOVL3</i> , <i>HGD</i> , <i>HAO2</i> , <i>SYT9</i> , <i>LPPR5</i> |
| 2014, Aug | Swindle et al.[3]    | LS skin vs UN skin + data from previous microarray-derived transcripts | Whole-tissue RNA-seq (Meta-analysis) | 1) The author compared RNA-seq-derived DEGs (N=3) with previously published microarray-derived DEGs (N=216).<br><br>2) Both RNA-seq and microarray uniquely identify genes as DEGs, however most                                                                        | <i>ARL2</i> , <i>AZGP1</i> , <i>CTNNBIP1</i> , <i>KY</i> , <i>LCE2B</i> , <i>LOR</i> , <i>NFASC</i> , <i>PSMB2</i> , <i>SBF1</i> , <i>TRIM7</i><br>(DEGs identified by RNA-seq, but not Microarray)                                                                                                                          | <i>COCH</i> , <i>ADAMTS2</i> , <i>ANKRD26</i> , <i>N6AMT1</i> , <i>LRRN3</i> , <i>SNURF</i> , <i>APLF</i> , <i>SLC25A53</i> , <i>TCHH</i> , <i>CEP290</i><br>(DEGs identified by RNA-seq, but not Microarray)                                                                                                 |

|           |                   |                                                                                                                                |                                      |                                                                                                                                                                                                                                                                                                                                           |                                                                                                                                                                                                                                                                                                                                                                                                                                                                                                                                                                                                                                                                                                                                                                                                                                                                      |                                                                                                                                                                                                                                                                                                                                                                                                                                                                                                                                                                                                                                                                                                                                                                                                                                                         |
|-----------|-------------------|--------------------------------------------------------------------------------------------------------------------------------|--------------------------------------|-------------------------------------------------------------------------------------------------------------------------------------------------------------------------------------------------------------------------------------------------------------------------------------------------------------------------------------------|----------------------------------------------------------------------------------------------------------------------------------------------------------------------------------------------------------------------------------------------------------------------------------------------------------------------------------------------------------------------------------------------------------------------------------------------------------------------------------------------------------------------------------------------------------------------------------------------------------------------------------------------------------------------------------------------------------------------------------------------------------------------------------------------------------------------------------------------------------------------|---------------------------------------------------------------------------------------------------------------------------------------------------------------------------------------------------------------------------------------------------------------------------------------------------------------------------------------------------------------------------------------------------------------------------------------------------------------------------------------------------------------------------------------------------------------------------------------------------------------------------------------------------------------------------------------------------------------------------------------------------------------------------------------------------------------------------------------------------------|
|           |                   |                                                                                                                                |                                      | of DEGs showed a similar trend from both 2 methods.                                                                                                                                                                                                                                                                                       |                                                                                                                                                                                                                                                                                                                                                                                                                                                                                                                                                                                                                                                                                                                                                                                                                                                                      |                                                                                                                                                                                                                                                                                                                                                                                                                                                                                                                                                                                                                                                                                                                                                                                                                                                         |
| 2016, May | Swindle et al.[4] | LS skin vs UN skin (RNA-seq-derived DEGs from previous studies)<br><br>PBMC of psoriasis patient vs PBMC of healthy individual | Whole-tissue RNA-seq (Meta-analysis) | <p>1) Psoriasis-specific DEGs were expressed by keratinocytes and induced by IL-17A, while non-specific DEGs were expressed by inflammatory cells and induced by IFN-<math>\gamma</math> and TNF.</p> <p>2) PBMC DEGs associated with MHC class I and NK cells were commonly downregulated in psoriasis and other autoimmune diseases</p> | <p><i>ABCG4, ACRV1, ADAMDEC1, ADH7, AIM2, AKR1B10, AKR1B15, ARSF, ATP12A, BATF2, C10orf99, C6orf223, CAMP, CASP5, CATSPERB, CCL18, CCL20, CCL3, CCL4, CCL7, CCR7, CD177, CD24, CD274, CD38, CD80, CDH26, CHAC1, CHI3L2, CHRNA, CLDN17, CLEC3A, CLLU1, CLLU1OS, CMPK2, CNFN, CPLX3, CTLA4, CXCL1, CXCL10, CXCL13, CXCL17, CXCL2, CXCL6, CXCL8, CXCL9, CXCR6, CYP24A1, DEFB4A, DEFB4B, DKK4, DSC2, ENKUR, EPGN, EPHB2, FABP5, FAM83A, FCGR1A, FCGR3A, FOSL1, FOXE1, FPR1, FPR2, FUT3, GBP6, GDA, GJB2, GJB6, GPR110, GPR15, GZMB, HABP2, HAS3, HEPHL1, HERC6, HPSE, HRH2, HRH3, HRNR, HTR3A, HYAL4, ICOS, IF127, IF144, IF16, IFNG, IGFL1, IL12B, IL17A, IL17C, IL17F, IL19, IL1B, IL20, IL26, IL36A, IL36G, IL36RN, INA, KCNJ15, KCNK10, KLHDC7B, KLK13, KLK6, KLK9, KRT16, KRT3, KRT6A, KRT6B, KRT6C, KYNU, LAIR2, LCE3A, LCE3C, LCE3D, LCE3E, LCN2, LILRA3,</i></p> | <p><i>AADACL3, ACADL, ACSBG1, ADAMTSL3, AGBL4, AGR3, ALDH1L1, ANKEN1, ANKRD2, ANKRD33B, AQP4, AQP7, AQP9, ATP13A5, AWAT1, AWAT2, BEST2, BTBD16, BTC, C10orf129, C1orf95, C1QL2, C5orf46, C5orf49, C9orf152, CA3, CA6, CA9, CACNA1H, CACNG4, CAMK2B, CAPN13, CBLN1, CCDC42B, CCER2, CCKBR, CCL27, CDH20, CDH4, CEACAMZ, CHAD, CHP2, CHRM1, CHRM4, CKM, CLDN23, CLDN3, CLDN8, CNTFR, COCH, Corf34, CPNE6, GABBR2, CPNE9, CRAT, CSMD1, CST6, CUX2, CYP1A1, CYP2W1, DBX2, DDC, DES, DGAT2L6, DIRAS2, DLK1, DNAH8, DOK7, EGF, ELOVL3, EMILIN3, ENHO, ERBB4, F3, FABP7, FACH, FADS2, FAM166B, FGF22, FGFBP2, FLG2, FRMD7, FSIP2, GAL, GJB4, GLDC, GPD1, GPR12, GSTA1, GSTA3, HAO2, HGD, HHATL, HMGCS2, HS3ST6, HS6ST2, HSD11B1, HSD3B1, IGFL2, IL34, IL37, KLRF2, KRT77, LCE5A, LINGO2, LINGO4, LRIT2, MACROD2, MAPK4, MAT1A, MATN4, METTL7B, MOGAT1,</i></p> |



|           |                       |                                                                              |                                                    |                                                                                                                                                                                                                                                      |                                                                                                                                                                                                 |                                                                                                                                                                                             |
|-----------|-----------------------|------------------------------------------------------------------------------|----------------------------------------------------|------------------------------------------------------------------------------------------------------------------------------------------------------------------------------------------------------------------------------------------------------|-------------------------------------------------------------------------------------------------------------------------------------------------------------------------------------------------|---------------------------------------------------------------------------------------------------------------------------------------------------------------------------------------------|
|           |                       |                                                                              |                                                    | DEGs than whole tissue RNA-seq.<br><br>4) UN keratinocytes may have intrinsic defects in differentiation capacity.                                                                                                                                   |                                                                                                                                                                                                 | <i>PDZK1IP1, PLA2G2F, PMEL, PSAPL1, PTX3, RADIL, RASD1, S100A4, S100A8, S100A9, SCG2, SERPINA12, SERPINB2, SERPINB4, SLURP1, SLURP1, SNTB1, SPRR2B, SPRR2G, SPRR3, TCEA3, TGM3, TSPAN10</i> |
| 2018, Jul | Ahn et al.[6]         | Whole tissue of scalp psoriasis, palmoplantar psoriasis and plaque psoriasis | Whole-tissue RNA-seq                               | 1) Common DEGs for the scalp, palmoplantar, and plaque psoriasis include genes that function in keratinocyte activation and proliferation.<br><br>2) The expression levels of IL-17A, IFN- $\gamma$ , IL-22 and common DEGs varied between subtypes. | <i>S100A7A, SPRR2A, SPRR2B, SERPINB4, S100A9, KRT6, C10orf99, LCE3D, LCE3E, IL36G</i>                                                                                                           |                                                                                                                                                                                             |
| 2018, Jun | Nattkemper et al. [7] | LS kin vs healthy skin in both psoriasis and atopic dermatitis               | Whole-tissue RNA-seq                               | 1) Several genes which mediated itch are unique for psoriasis or atopic dermatitis<br><br>2) several molecules are common itch mediator among psoriasis and atopic dermatitis                                                                        | - DEGs involved in itch, which are unique to psoriasis<br><i>CCL20, CCL4, CCL8, CXCR1, HRH3, IL19, IL20, IL26, IL36A, IL36G, KLK8, MRGPRX3, F2RL2(PAR3), PLCG1, S100A7, S100P, TRPM8, TRPV3</i> |                                                                                                                                                                                             |
| 2019, Feb | Pasquali et al. [8]   | Keratinocyte from UN skin, LS skin and healthy skin                          | Specific cell RNA-seq (CD45 magnetic cell sorting) | Deregulated genes enriched in function involving innate immunity, type I interferon response, cell cycle and keratinization.                                                                                                                         | <i>IFI44, IFI44L, DDX60, TNIP3, EPGN</i>                                                                                                                                                        | <i>NR4A3</i>                                                                                                                                                                                |

|           |                |                          |                                                                                                                                                      |                                                                                                                                                                                                                                                                                                                                                                                                                                                                                                                                                                                                                           |                                                                                                                                                                                                                                                                                                                                                                                                                                  |                                        |
|-----------|----------------|--------------------------|------------------------------------------------------------------------------------------------------------------------------------------------------|---------------------------------------------------------------------------------------------------------------------------------------------------------------------------------------------------------------------------------------------------------------------------------------------------------------------------------------------------------------------------------------------------------------------------------------------------------------------------------------------------------------------------------------------------------------------------------------------------------------------------|----------------------------------------------------------------------------------------------------------------------------------------------------------------------------------------------------------------------------------------------------------------------------------------------------------------------------------------------------------------------------------------------------------------------------------|----------------------------------------|
| 2021, Apr | Kim et al. [9] | LS skin and healthy skin | Single-cell RNA-seq (Natural killer cells, T-cell subsets, dendritic cell subsets, melanocytes and keratinocytes were isolated using flow cytometry) | <p>1) Cutaneous type 17 T cells have transcriptome profiles that differ greatly in terms of IL-17A versus IL-17F expression and IFN-<math>\gamma</math> versus IL-10 expression.</p> <p>2) IL-23A and IL-36G are also expressed by a subset of regulatory dendritic cells (DCs).</p> <p>3) The decreased CCL27 expression in basal keratinocytes potentially contributes to impaired CCL27-CCR10 interaction.</p> <p>-The authors suggested that single-cell RNA-seq provides a novel research platform for comparing gene expression profiles of heterogeneous immune cells in various inflammatory skin conditions.</p> | <p>- CD4+17 expressed <i>IL17A</i> and <i>IL17F</i></p> <p>- <i>IL17F</i> was undetected in CD8+17 cells</p> <p>- Fifty percent of CD8+17 and 13.5% of CD4+17 expressed <i>IFNG</i></p> <p>- 5.8% of CD4+17 expressed <i>IL10</i></p> <p>- <i>IL10</i> was undetected in CD8+17 cells</p> <p>- Mature DCs<br/><i>IL23</i>, <i>IL36G</i></p> <p>- semi mature DCs (regulatory DCS)<br/><i>IL10</i>, <i>IL23</i>, <i>IL36G</i></p> | - KC of stratum basale<br><i>CCL27</i> |
|-----------|----------------|--------------------------|------------------------------------------------------------------------------------------------------------------------------------------------------|---------------------------------------------------------------------------------------------------------------------------------------------------------------------------------------------------------------------------------------------------------------------------------------------------------------------------------------------------------------------------------------------------------------------------------------------------------------------------------------------------------------------------------------------------------------------------------------------------------------------------|----------------------------------------------------------------------------------------------------------------------------------------------------------------------------------------------------------------------------------------------------------------------------------------------------------------------------------------------------------------------------------------------------------------------------------|----------------------------------------|

*The red molecules* were upregulated, whereas the *green molecules* were downregulated in the peripheral edge of lesion. DEGs, differentially expressed genes



## 1.4. Canonical pathways

**Supplementary Table S8.** The 7 canonical pathways with their ratio.

They were calculated using a statistically significant  $p$ -value overlap  $< 0.05$ , Fisher's Exact Test and  $|z\text{-score}| \geq 2$ .

| <b>Ingenuity Canonical Pathways</b> | <b><math>-\log(p\text{-value})</math></b> | <b>Ratio</b> | <b>z-score</b> |
|-------------------------------------|-------------------------------------------|--------------|----------------|
| eIF2 Signaling                      | 3.25E+01                                  | 2.99E-01     | -5.096         |
| Coronavirus Pathogenesis Pathway    | 1.60E+01                                  | 2.53E-01     | 3.452          |
| NER Pathway                         | 4.18E+00                                  | 1.55E-01     | -2.84          |
| HER-2 Signaling in Breast Cancer    | 3.40E+00                                  | 1.13E-01     | 2.132          |
| Role of IL-17A in Psoriasis         | 3.33E+00                                  | 3.57E-01     | 2.236          |
| Oxidative Phosphorylation           | 2.88E+00                                  | 1.28E-01     | -3.207         |
| LXR/RXR Activation                  | 2.45E+00                                  | 1.16E-01     | -2.530         |

Ratio = mapped DEGs divided by total molecules in given pathway

## 1.5. Upstream regulator analysis

**Supplementary Table S9.** Upstream regulator analysis of peripheral edge of lesional skin.

| <b>Potential regulator</b> | <b>Molecule type</b>              | <b>Predicted activity in PR skin</b> | <b>Log2 FC</b> | <b>Activation Z-score</b> | <b><math>p</math>-value overlap</b> | <b>Co-regulator</b> | <b>Number of DEG targets</b> |
|----------------------------|-----------------------------------|--------------------------------------|----------------|---------------------------|-------------------------------------|---------------------|------------------------------|
| LARP1                      | translation regulator             | Activated                            |                | 7.42                      | 3.290E-50                           | 0                   | 55                           |
| MYCN                       | transcription regulator           | Inhibited                            |                | -5.17                     | 8.960E-33                           | 11                  | 367                          |
| MLXIPL                     | transcription regulator           | Inhibited                            |                | -6.05                     | 2.080E-32                           | 0                   | 55                           |
| MYC                        | transcription regulator           | Inhibited                            |                | -4.39                     | 1.840E-28                           | 19                  | 462                          |
| OSM                        | cytokine                          | Activated                            |                | 5.18                      | 4.100E-19                           | 16                  | 461                          |
| <b>RICTOR</b>              | other                             | Activated                            | 2.238          | 6.23                      | 3.270E-18                           | 15                  | 406                          |
| ESR1                       | ligand-dependent nuclear receptor | Activated                            |                | 3.04                      | 9.380E-15                           | 18                  | 525                          |
| IFNG                       | cytokine                          | Activated                            |                | 2.21                      | 4.240E-10                           | 14                  | 434                          |
| TNF                        | cytokine                          | Activated                            |                | 2.49                      | 2.090E-08                           | 16                  | 483                          |
| CD24                       | other                             | Activated                            |                | 3.99                      | 3.800E-08                           | 7                   | 135                          |
| VCAN                       | other                             | Activated                            |                | 4.07                      | 4.980E-08                           | 13                  | 216                          |
| SIRT1                      | transcription regulator           | Inhibited                            |                | -2.70                     | 1.500E-07                           | 18                  | 453                          |
| IFNA2                      | cytokine                          | Activated                            |                | 3.38                      | 2.570E-07                           | 20                  | 503                          |
| IL1B                       | cytokine                          | Activated                            |                | 2.40                      | 7.400E-07                           | 17                  | 436                          |
| IL22                       | cytokine                          | Activated                            |                | 3.24                      | 3.140E-06                           | 17                  | 403                          |
| TNIP1                      | other                             | Inhibited                            |                | -3.27                     | 5.970E-06                           | 0                   | 11                           |
| RNASEH1                    | enzyme                            | Inhibited                            |                | -2.00                     | 7.620E-06                           | 0                   | 4                            |
| EHF                        | transcription regulator           | Activated                            |                | 2.50                      | 9.740E-06                           | 0                   | 17                           |
| ROCK2                      | kinase                            | Activated                            |                | 2.16                      | 9.980E-06                           | 0                   | 12                           |
| IRGM                       | enzyme                            | Inhibited                            |                | -2.88                     | 9.980E-06                           | 0                   | 12                           |
| <b>STAT1</b>               | transcription regulator           | Activated                            | 3.384          | 2.75                      | 1.110E-05                           | 17                  | 452                          |
| Irgm1                      | other                             | Inhibited                            |                | -3.64                     | 1.120E-05                           | 11                  | 203                          |
| IRF7                       | transcription regulator           | Activated                            |                | 3.34                      | 1.220E-05                           | 13                  | 220                          |
| CDK4/6                     | group                             | Activated                            |                | 2.52                      | 1.660E-05                           | 0                   | 14                           |
| IFNAR1                     | transmembrane receptor            | Activated                            |                | 2.30                      | 2.110E-05                           | 17                  | 411                          |
| <b>DDX21</b>               | enzyme                            | Inhibited                            | 2.52           | -2.00                     | 3.650E-05                           | 0                   | 4                            |
| IFNL1                      | cytokine                          | Activated                            |                | 3.79                      | 3.860E-05                           | 15                  | 448                          |
| Interferon alpha           | group                             | Activated                            |                | 3.43                      | 4.670E-05                           | 15                  | 406                          |
| IL17C                      | cytokine                          | Activated                            |                | 2.79                      | 5.180E-05                           | 9                   | 235                          |
| SIRT7                      | enzyme                            | Inhibited                            |                | -2.40                     | 6.940E-05                           | 0                   | 6                            |
| PTGER2                     | G-protein coupled receptor        | Activated                            |                | 2.71                      | 9.240E-05                           | 20                  | 310                          |
| CAB39L                     | kinase                            | Inhibited                            |                | -2.99                     | 1.220E-04                           | 5                   | 237                          |

|                                                    |                                      |           |        |       |           |    |     |
|----------------------------------------------------|--------------------------------------|-----------|--------|-------|-----------|----|-----|
| IL1A                                               | cytokine                             | Activated |        | 2.01  | 1.390E-04 | 14 | 377 |
| PAF1                                               | other                                | Activated |        | 2.33  | 1.960E-04 | 0  | 10  |
| Firre                                              | other                                | Inhibited |        | -3.61 | 3.340E-04 | 0  | 13  |
| PLA2G2E                                            | enzyme                               | Inhibited |        | -2.22 | 3.600E-04 | 0  | 5   |
| NGLY1                                              | enzyme                               | Inhibited |        | -2.80 | 3.770E-04 | 0  | 8   |
| NFKBIZ                                             | transcription regulator              | Activated |        | 2.58  | 3.840E-04 | 11 | 277 |
| IFN Beta                                           | group                                | Activated |        | 2.76  | 3.910E-04 | 17 | 406 |
| CCND1                                              | transcription regulator              | Activated | -1.827 | 2.29  | 4.910E-04 | 18 | 421 |
| miR-30c-5p (and other<br>miRNAs w/seed<br>GUAAACA) | mature microRNA                      |           |        | -2.02 | 5.690E-04 | 0  | 18  |
| NKX2-3                                             | transcription regulator              | Inhibited |        | -2.14 | 6.330E-04 | 0  | 24  |
| SEL1L                                              | other                                | Inhibited |        | -2.71 | 1.030E-03 | 0  | 13  |
| STK11                                              | kinase                               | Inhibited |        | -2.39 | 1.420E-03 | 18 | 426 |
| HELLS                                              | enzyme                               | Activated |        | 2.00  | 1.450E-03 | 0  | 5   |
| NUPR1                                              | transcription regulator              | Inhibited | -2.183 | -4.01 | 1.510E-03 | 0  | 43  |
| IL36A                                              | cytokine                             | Activated | 14.572 | 2.60  | 2.010E-03 | 0  | 7   |
| CAT                                                | enzyme                               | Activated |        | 2.20  | 2.130E-03 | 20 | 414 |
| IRF5                                               | transcription regulator              | Activated |        | 3.26  | 2.160E-03 | 13 | 251 |
| RNY3                                               | other                                | Activated |        | 2.45  | 2.390E-03 | 0  | 6   |
| IRF3                                               | transcription regulator              | Activated |        | 4.01  | 2.910E-03 | 16 | 356 |
| TLR3                                               | transmembrane receptor               | Activated |        | 2.41  | 3.360E-03 | 15 | 376 |
| HSP90B1                                            | other                                | Inhibited |        | -2.33 | 3.500E-03 | 0  | 9   |
| CARM1                                              | transcription regulator              | Inhibited |        | -2.17 | 3.830E-03 | 18 | 432 |
| AKT1                                               | kinase                               | Inhibited |        | -2.07 | 4.540E-03 | 18 | 475 |
| IRF1                                               | transcription regulator              | Activated |        | 2.69  | 4.930E-03 | 15 | 401 |
| IL17R                                              | complex                              | Activated |        | 2.22  | 4.960E-03 | 0  | 5   |
| ALDH1A2                                            | enzyme                               | Activated |        | 2.41  | 5.840E-03 | 12 | 359 |
| ACKR2                                              | G-protein coupled<br>receptor        |           |        | -2.65 | 6.690E-03 | 7  | 169 |
| LMNB1                                              | other                                | Inhibited |        | -2.00 | 6.900E-03 | 0  | 8   |
| IPMK                                               | kinase                               | Inhibited |        | -2.24 | 7.350E-03 | 0  | 5   |
| GNA12                                              | enzyme                               | Activated |        | 2.20  | 7.600E-03 | 13 | 225 |
| IL1RN                                              | cytokine                             | Inhibited |        | -3.19 | 9.110E-03 | 15 | 287 |
| ATF3                                               | transcription regulator              | Inhibited |        | -2.04 | 9.110E-03 | 19 | 440 |
| TLR9                                               | transmembrane receptor               | Activated |        | 3.06  | 1.040E-02 | 0  | 22  |
| MSTN                                               | growth factor                        | Inhibited |        | -2.23 | 1.080E-02 | 0  | 9   |
| NR3C1                                              | ligand-dependent<br>nuclear receptor |           |        | -2.20 | 1.100E-02 | 0  | 52  |
| IL10RA                                             | transmembrane receptor               | Inhibited |        | -2.33 | 1.420E-02 | 0  | 26  |
| CDH11                                              | other                                | Inhibited |        | -2.24 | 1.430E-02 | 0  | 5   |
| PRKCA                                              | kinase                               | Activated |        | 2.15  | 1.450E-02 | 0  | 13  |
| CPT1B                                              | enzyme                               | Activated |        | 2.30  | 1.820E-02 | 0  | 19  |
| GCK                                                | kinase                               | Activated |        | 2.22  | 1.900E-02 | 0  | 5   |
| Akt                                                | group                                | Activated |        | 2.30  | 2.100E-02 | 0  | 30  |
| IFNB1                                              | cytokine                             | Activated |        | 2.09  | 2.320E-02 | 0  | 24  |
| IL6                                                | cytokine                             | Activated |        | 2.56  | 2.430E-02 | 0  | 55  |
| Ifn                                                | group                                | Activated |        | 3.26  | 2.710E-02 | 0  | 12  |
| IL2                                                | cytokine                             | Activated |        | 2.18  | 2.900E-02 | 0  | 45  |
| Ifn gamma                                          | complex                              | Activated |        | 2.40  | 3.130E-02 | 0  | 10  |
| SP110                                              | transcription regulator              | Inhibited |        | -2.50 | 3.500E-02 | 0  | 13  |
| ACOX1                                              | enzyme                               | Activated |        | 2.15  | 4.240E-02 | 0  | 13  |
| KDM5A                                              | transcription regulator              | Activated | 1.905  | 2.15  | 4.340E-02 | 0  | 12  |
| ARID1A                                             | transcription regulator              | Inhibited |        | -2.37 | 4.630E-02 | 0  | 6   |
| STING1                                             | other                                | Activated |        | 2.62  | 4.680E-02 | 0  | 7   |

The table provides the potential regulators and their predicted activity in peripheral edge of lesional skin using a statistically significant overlap between the dataset genes and the genes that are regulated by a potential regulator ( $p$ -value overlap  $< 0.05$ , Fisher's Exact Test) and absolute activation z-score ( $|z\text{-score}| \geq 2$ )

\*Molecule types are classified into complex, cytokine, enzyme, fusion gene/product, G-protein coupled receptor, group, growth factor, ion channel, kinase, ligand-dependent nuclear receptor, mature microRNA, peptidase, phosphatase, transcription regulator, translation regulator, transmembrane receptor and transporter. None of these were classified as other.

\* **Red molecules** are identified as upregulated DEGs, whereas **green molecules** are identified as downregulated DEGs in perilesional skin DEGs, differentially expressed genes; FC, fold change.

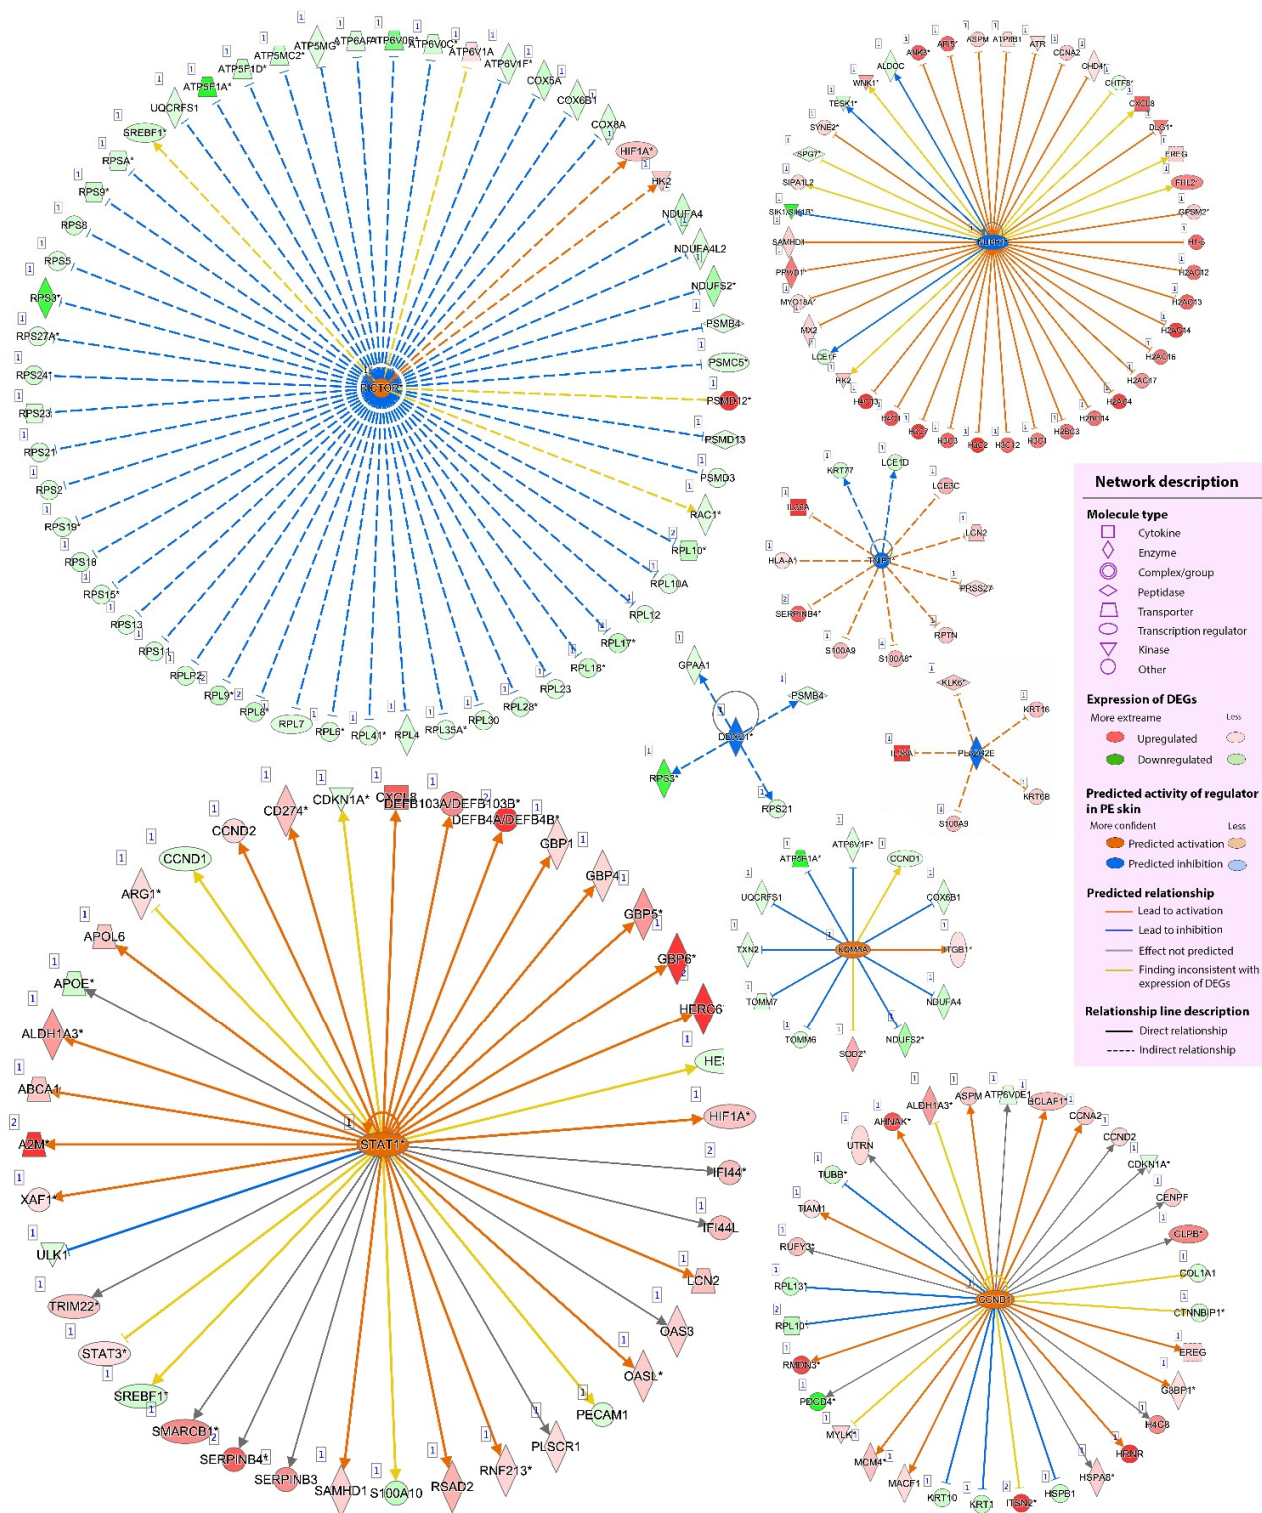

**Supplementary Figure S2.** Potential regulators and their relationship to target dataset's DEGs.

In each radiant, the molecule at the center is the predicted potential regulator and the outer circular molecules are the dataset's DEGs. DEGs, differentially expressed genes; PE skin, peripheral edge of lesional skin.

**Supplementary Table S10.** Demographic data of the patients for transcriptomic profile.

| Number | Age (year) | Sex  | Underlying disease | BMI (kg/m <sup>2</sup> ) | PASI | Lesion |                       |              |                  | Personal history           |                  |         |
|--------|------------|------|--------------------|--------------------------|------|--------|-----------------------|--------------|------------------|----------------------------|------------------|---------|
|        |            |      |                    |                          |      | Skin   | Plaque characteristic | Scalp lesion | Nail involvement | Psoriasis in family member | Alcohol drinking | Smoking |
| 1      | 23         | Male | ✖                  | 20.3                     | 12.2 | ✓      | Instable              | ✓            | ✓                | ✓                          | ✖                | ✖       |
| 2      | 39         | Male | ✖                  | 20.5                     | 35.5 | ✓      | Instable              | ✖            | ✓                | ✖                          | ✖                | ✖       |
| 3      | 57         | Male | ✖                  | 24.4                     | 12.5 | ✓      | Instable              | ✓            | ✓                | ✖                          | ✖                | ✖       |

BMI; Body mass index

PASI; Psoriasis area severity index

### 3. Methodology

**Supplementary Table S11.** Assay ID of the primers for multiplex qPCR

|                                     | Gene Symbol              | Assay ID      |
|-------------------------------------|--------------------------|---------------|
| DEGs                                | <i>IL36A</i>             | Hs01015266_g1 |
|                                     | <i>PLSCR1</i>            | Hs01062171_m1 |
|                                     | <i>CXCL8</i>             | Hs00174103_m1 |
|                                     | <i>SERPINB4</i>          | Hs01691258_g1 |
|                                     | <i>DEFB4A/DEFB4B</i>     | Hs00175474_m1 |
|                                     | <i>DEFB103A/DEFB103B</i> | Hs04195435_g1 |
|                                     | <i>S100A7</i>            | Hs00161488_m1 |
|                                     | <i>S100A7A</i>           | Hs00752780_s1 |
|                                     | <i>S100A8</i>            | Hs00374264_g1 |
|                                     | <i>S100A9</i>            | Hs00610058_m1 |
| Regulators                          | <i>IL17C</i>             | Hs00171163_m1 |
|                                     | <i>NFKBIZ</i>            | Hs00230071_m1 |
|                                     | <i>ROCK2</i>             | Hs00178154_m1 |
| Internal control                    | <i>GAPDH</i>             | Hs02786624_g1 |
| DEGs, differentially expressed gene |                          |               |

## References

1. Jabbari, A.; Suárez-Fariñas, M.; Dewell, S.; Krueger, J.G. Transcriptional profiling of psoriasis using RNA-seq reveals previously unidentified differentially expressed genes. *J Invest Dermatol* **2012**, *132*, 246-249, doi:10.1038/jid.2011.267.
2. Li, B.; Tsoi, L.C.; Swindell, W.R.; Gudjonsson, J.E.; Tejasvi, T.; Johnston, A.; Ding, J.; Stuart, P.E.; Xing, X.; Kochkodan, J.J.; et al. Transcriptome analysis of psoriasis in a large case-control sample: RNA-seq provides insights into disease mechanisms. *J Invest Dermatol* **2014**, *134*, 1828-1838, doi:10.1038/jid.2014.28.
3. Swindell, W.R.; Xing, X.; Voorhees, J.J.; Elder, J.T.; Johnston, A.; Gudjonsson, J.E. Integrative RNA-seq and microarray data analysis reveals GC content and gene length biases in the psoriasis transcriptome. *Physiol Genomics* **2014**, *46*, 533-546, doi:10.1152/physiolgenomics.00022.2014.
4. Swindell, W.R.; Sarkar, M.K.; Liang, Y.; Xing, X.; Gudjonsson, J.E. Cross-Disease Transcriptomics: Unique IL-17A Signaling in Psoriasis Lesions and an Autoimmune PBMC Signature. *J Invest Dermatol* **2016**, *136*, 1820-1830, doi:10.1016/j.jid.2016.04.035.
5. Swindell, W.R.; Sarkar, M.K.; Liang, Y.; Xing, X.; Baliwag, J.; Elder, J.T.; Johnston, A.; Ward, N.L.; Gudjonsson, J.E. RNA-seq identifies a diminished differentiation gene signature in primary monolayer keratinocytes grown from lesional and uninvolved psoriatic skin. *Sci Rep* **2017**, *7*, 18045, doi:10.1038/s41598-017-18404-9.
6. Ahn, R.; Yan, D.; Chang, H.W.; Lee, K.; Bhattarai, S.; Huang, Z.M.; Nakamura, M.; Singh, R.; Afifi, L.; Taravati, K.; et al. RNA-seq and flow-cytometry of conventional, scalp, and palmoplantar psoriasis reveal shared and distinct molecular pathways. *Sci Rep* **2018**, *8*, 11368, doi:10.1038/s41598-018-29472-w.
7. Nattkemper, L.A.; Tey, H.L.; Valdes-Rodriguez, R.; Lee, H.; Mollanazar, N.K.; Albornoz, C.; Sanders, K.M.; Yosipovitch, G. The Genetics of Chronic Itch: Gene Expression in the Skin of Patients with Atopic Dermatitis and Psoriasis with Severe Itch. *J Invest Dermatol* **2018**, *138*, 1311-1317, doi:10.1016/j.jid.2017.12.029.
8. Pasquali, L.; Srivastava, A.; Meisgen, F.; Das Mahapatra, K.; Xia, P.; Xu Landén, N.; Pivarsci, A.; Sonkoly, E. The Keratinocyte Transcriptome in Psoriasis: Pathways Related to Immune Responses, Cell Cycle and Keratinization. *Acta Derm Venereol* **2019**, *99*, 196-205, doi:10.2340/00015555-3066.
9. Kim, J.; Lee, J.; Kim, H.J.; Kameyama, N.; Nazarian, R.; Der, E.; Cohen, S.; Guttman-Yassky, E.; Putterman, C.; Krueger, J.G. Single-cell transcriptomics applied to emigrating cells from psoriasis elucidate pathogenic versus regulatory immune cell subsets. *J Allergy Clin Immunol* **2021**, *148*, 1281-1292, doi:10.1016/j.jaci.2021.04.021.
